# Supplementary material for: Competence for transcellular infection in the root cortex involves a post-replicative, cell-cycle exit decision in Medicago truncatula
Source: eLife journal article supplement (doi:10.7554/elife.88588), 2023-07-19
Supplement: fig8-figsupp1-data1 [file elife-88588-fig8-figsupp1-data1-v1.zip]

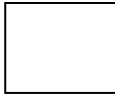

: cropped area

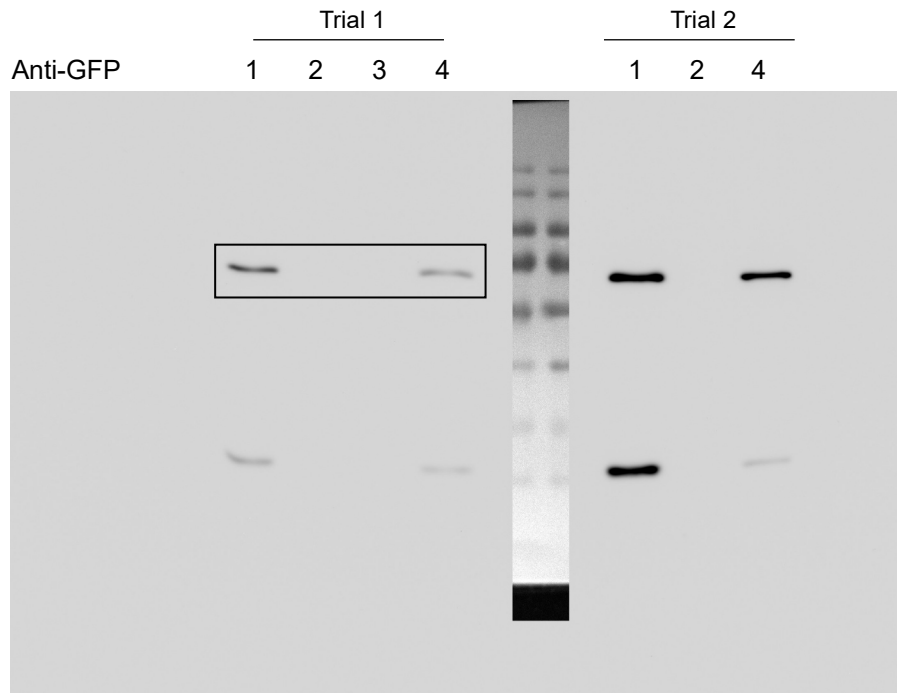

- 1: p35S::CYCD3;1-HA + pKNOLLE::eGFP-KNOLLE / pH3.3::H3.3-mCherry
- 2: pKNOLLE::eGFP-KNOLLE / pH3.3::H3.3-mCherry
- 3: pLjUbi::FLAG-NF-YA1 + pKNOLLE::eGFP-KNOLLE / pH3.3::H3.3-mCherry
- 4: p35S::CYCD3;1-HA / pLjUbi::FLAG-NF-YA1 + pKNOLLE::eGFP-KNOLLE / pH3.3::H3.3-mCherry

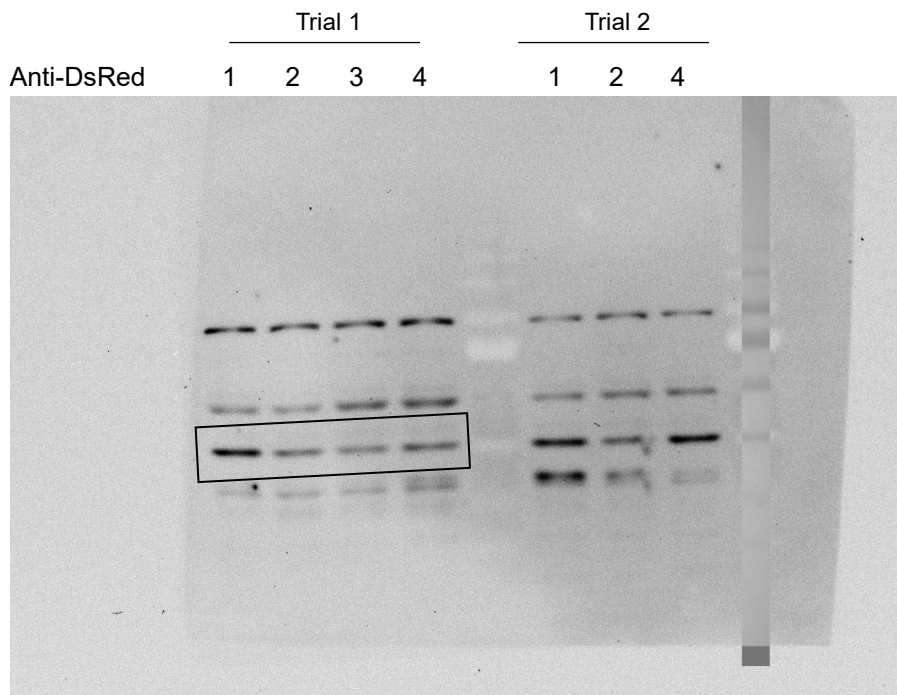

- 1: p35S::CYCD3;1-HA + pKNOLLE::eGFP-KNOLLE / pH3.3::H3.3-mCherry
- 2: pKNOLLE::eGFP-KNOLLE / pH3.3::H3.3-mCherry
- 3: pLjUbi::FLAG-NF-YA1 + pKNOLLE::eGFP-KNOLLE / pH3.3::H3.3-mCherry
- 4: p35S::CYCD3;1-HA / pLjUbi::FLAG-NF-YA1 + pKNOLLE::eGFP-KNOLLE / pH3.3::H3.3-mCherry

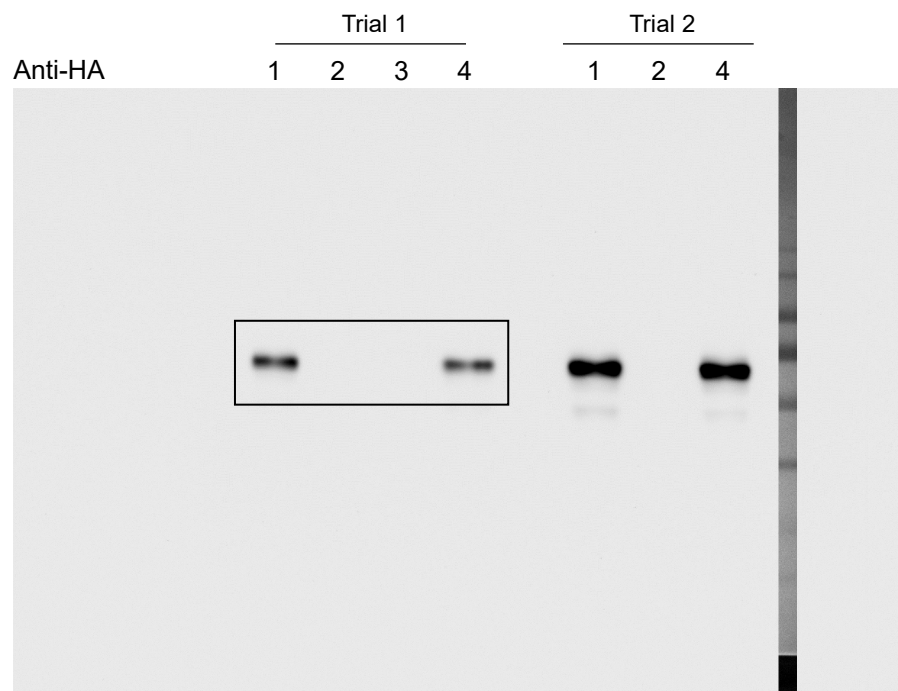

- 1: p35S::CYCD3;1-HA + pKNOLLE::eGFP-KNOLLE / pH3.3::H3.3-mCherry
- 2: pKNOLLE::eGFP-KNOLLE / pH3.3::H3.3-mCherry
- 3: pLjUbi::FLAG-NF-YA1 + pKNOLLE::eGFP-KNOLLE / pH3.3::H3.3-mCherry
- 4: p35S::CYCD3;1-HA / pLjUbi::FLAG-NF-YA1 + pKNOLLE::eGFP-KNOLLE / pH3.3::H3.3-mCherry

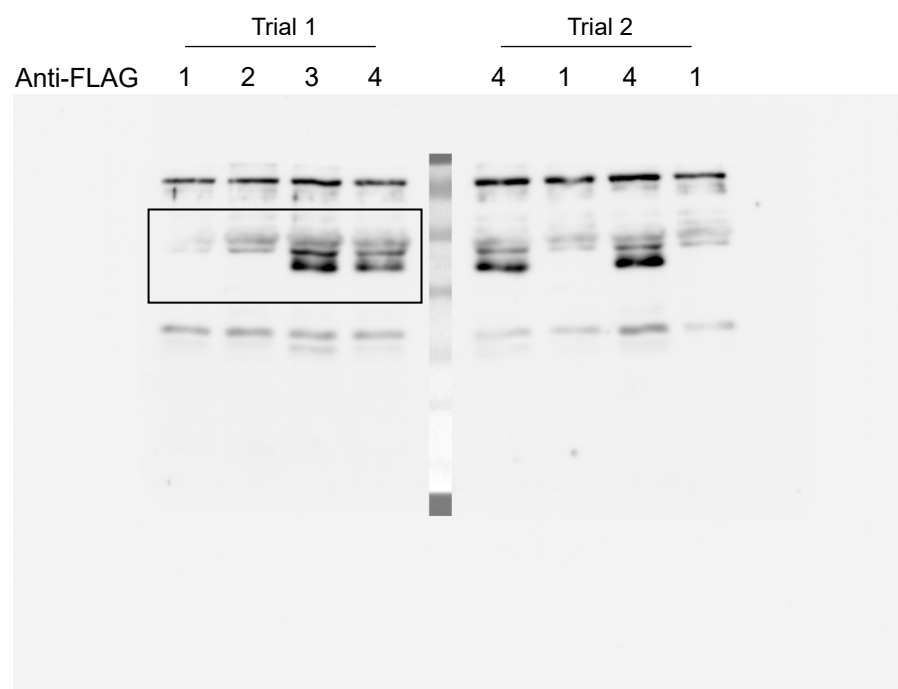

- 1: p35S::CYCD3;1-HA + pKNOLLE::eGFP-KNOLLE / pH3.3::H3.3-mCherry
- 2: pKNOLLE::eGFP-KNOLLE / pH3.3::H3.3-mCherry
- 3: pLjUbi::FLAG-NF-YA1 + pKNOLLE::eGFP-KNOLLE / pH3.3::H3.3-mCherry
- 4: p35S::CYCD3;1-HA / pLjUbi::FLAG-NF-YA1 + pKNOLLE::eGFP-KNOLLE / pH3.3::H3.3-mCherry

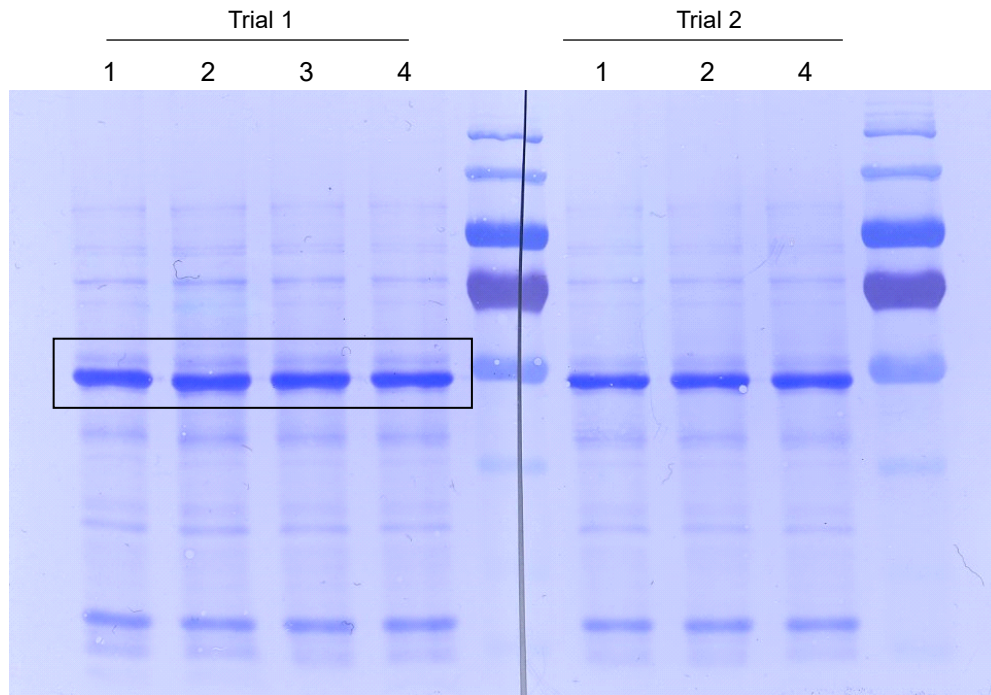

Coomassie blue-stained membrane (CBS)

1: p35S::CYCD3;1-HA + pKNOLLE::eGFP-KNOLLE / pH3.3::H3.3-mCherry

2: pKNOLLE::eGFP-KNOLLE / pH3.3::H3.3-mCherry

3: pLjUbi::FLAG-NF-YA1 + pKNOLLE::eGFP-KNOLLE / pH3.3::H3.3-mCherry

4: p35S::CYCD3;1-HA / pLjUbi::FLAG-NF-YA1 + pKNOLLE::eGFP-KNOLLE / pH3.3::H3.3-mCherry

**Figure 8 – figure supplement 1 – source data 1.** Original membranes corresponding to Figure 8 – figure supplement 1A. PageRuler™ Prestained Protein Ladder, 10 to 180 kDa was used (Thermo Fisher Scientific Product# 26616). Samples from 2 independent transformation experiments (Trial 1 and 2) are shown. Cropped areas displayed in Figure 8 – figure supplement 1A are indicated by a box.
