# Supplementary material for: Competence for transcellular infection in the root cortex involves a post-replicative, cell-cycle exit decision in Medicago truncatula
Source: eLife. 2025 Jul 4;12:RP88588. doi: 10.7554/eLife.88588 (PMC12227204; doi:10.7554/eLife.88588)
Supplement: Figure 1—figure supplement 1—source data 1. [file elife-88588-fig1-figsupp1-data1.xlsx]

## Sheet: Values
Figure 1 – figure supplement 1 – source data 1
Transcript levels (log2_TMM) of selected H3.1 and H3.3 genes in mock or S. meliloti (S.m.) spot-inoculated roots (Schiessl et al., 2019).
All data points were retrieved from MtExpress V3 (Carrere et al., 2021).
	H3.1
Mock (24 h)	3.71	3.86	3.87	3.86
S.m. (24 h)	5.1	5.2	5.07	4.78
	H3.1 (2)
Mock (24 h)	5.23	5.19	5.4	5.42
S.m. (24 h)	6.46	6.62	6.68	6.66
	H3.3
Mock (24 h)	6.23	6.42	6.18	6.31
S.m. (24 h)	6.43	6.63	6.69	6.45

## Sheet: Descriptive statistics
	H3.1			H3.1 (2)			H3.3
	Median	Upper limit	Lower limit	Median	Upper limit	Lower limit	Median	Upper limit	Lower limit
Mock (24 h)	3.86	3.87	3.71	5.315	5.42	5.19	6.27	6.42	6.18
S.m. (24 h)	5.085	5.2	4.78	6.64	6.68	6.46	6.54	6.69	6.43

## Sheet: Normality_H3.1
	Mock (24h)	S.m. (24h)
Test for normal distribution
Shapiro-Wilk test
W	0.6831	0.8828
P value	0.0073	0.3506
Passed normality test (alpha=0.05)?	No	Yes
P value summary	**	ns
Kolmogorov-Smirnov test
KS distance	N too small	N too small
P value
Passed normality test (alpha=0.05)?
P value summary
Number of values	4	4

## Sheet: Mann-Whitney_H3.1
Column B	S.m. (24h)
vs.	vs,
Column A	Mock (24h)
Mann Whitney test
P value	0.0286
Exact or approximate P value?	Exact
P value summary	*
Significantly different (P < 0.05)?	Yes
One- or two-tailed P value?	Two-tailed
Sum of ranks in column A,B	10 , 26
Mann-Whitney U	0
Difference between medians
Median of column A	3,860, n=4
Median of column B	5,085, n=4
Difference: Actual	1.225
Difference: Hodges-Lehmann	1.235

## Sheet: Normality_H3.1 (2)
	Mock (24h)	S.m. (24h)
Test for normal distribution
Shapiro-Wilk test
W	0.847	0.8333
P value	0.2165	0.1767
Passed normality test (alpha=0.05)?	Yes	Yes
P value summary	ns	ns
Kolmogorov-Smirnov test
KS distance	N too small	N too small
P value
Passed normality test (alpha=0.05)?
P value summary
Number of values	4	4

## Sheet: Mann-Whitney_H3.1 (2)
Column B	S,m, (24h)
vs.	vs,
Column A	Mock (24h)
Mann Whitney test
P value	0.0286
Exact or approximate P value?	Exact
P value summary	*
Significantly different (P < 0.05)?	Yes
One- or two-tailed P value?	Two-tailed
Sum of ranks in column A,B	10 , 26
Mann-Whitney U	0
Difference between medians
Median of column A	5,315, n=4
Median of column B	6,640, n=4
Difference: Actual	1.325
Difference: Hodges-Lehmann	1.265

## Sheet: Normality_H3.3
	Mock (24h)	S.m. (24h)
Test for normal distribution
Shapiro-Wilk test
W	0.9658	0.8636
P value	0.815	0.2734
Passed normality test (alpha=0.05)?	Yes	Yes
P value summary	ns	ns
Kolmogorov-Smirnov test
KS distance	N too small	N too small
P value
Passed normality test (alpha=0.05)?
P value summary
Number of values	4	4

## Sheet: Mann-Whitney_H3.3
Column B	S,m, (24h)
vs.	vs,
Column A	Mock (24h)
Mann Whitney test
P value	0.0286
Exact or approximate P value?	Exact
P value summary	*
Significantly different (P < 0.05)?	Yes
One- or two-tailed P value?	Two-tailed
Sum of ranks in column A,B	10 , 26
Mann-Whitney U	0
Difference between medians
Median of column A	6,270, n=4
Median of column B	6,540, n=4
Difference: Actual	0.27
Difference: Hodges-Lehmann	0.26
