# Supplementary material for: Competence for transcellular infection in the root cortex involves a post-replicative, cell-cycle exit decision in Medicago truncatula
Source: eLife. 2025 Jul 4;12:RP88588. doi: 10.7554/eLife.88588 (PMC12227204; doi:10.7554/eLife.88588)
Supplement: Figure 1—figure supplement 1—source data 2. [file elife-88588-fig1-figsupp1-data2.xlsx]

## Sheet: Values
Figure 1 – figure supplement 1 – source data 2
Transcript levels (log2_TMM) of selected H3.1 and H3.3 genes in mature nodule regions isolated by laser-capture microdissection (Roux et al., 2014).
All data points were retrieved from MtExpress V3 (Carrere et al., 2021).
	H3.1
ZI	5.93	5.58	6.36
ZIId	3.59	3.76	3.42
ZIIp	0.873	0.469	2.24
IZ	nd	nd	nd
ZIII	nd	nd	nd
	H3.1 (2)
ZI	7.98	7.84	8.39
ZIId	7.04	6.87	6.69
ZIIp	5.02	3.39	5.96
IZ	nd	nd	nd
ZIII	nd	nd	nd
	H3.3
ZI	8.15	7.91	8.65
ZIId	8.25	8.41	8.33
ZIIp	6.4	4.97	8.79
IZ	7.58	7.93	10.3
ZIII	7.92	7.49	9.75

## Sheet: Descriptive statistics
	H3.1			H3.1 (2)			H3.3
	Median	Upper limit	Lower limit	Median	Upper limit	Lower limit	Median	Upper limit	Lower limit
ZI	5.93	6.36	5.58	7.98	8.39	7.84	8.15	8.65	7.91
ZIId	3.59	3.76	3.42	6.87	7.04	6.69	8.33	8.41	8.25
ZIIp	0.873	2.24	0.469	5.02	5.96	3.39	6.4	8.79	4.97
IZ	nd	nd	nd	nd	nd	nd	7.93	10.3	7.58
ZIII	nd	nd	nd	nd	nd	nd	7.92	9.75	7.49

## Sheet: Normality_H3.1
	ZI	ZIId	ZIIp
Test for normal distribution
Shapiro-Wilk test
W	0.9965	1	0.9103
P value	0.887	>0,9999	0.419
Passed normality test (alpha=0.05)?	Yes	Yes	Yes
P value summary	ns	ns	ns
Kolmogorov-Smirnov test
KS distance	N too small	N too small	N too small
P value
Passed normality test (alpha=0.05)?
P value summary
Number of values	3	3	3

## Sheet: Kruskal-Wallis_H3.1
Number of families	1
Number of comparisons per family	3
Alpha	0.05
Dunn's multiple comparisons test	Mean rank diff,	Significant?	Summary	Adjusted P Value
ZI vs. ZIId	3	No	ns	0.5391
ZI vs. ZIIp	6	Yes	*	0.0219
ZIId vs. ZIIp	3	No	ns	0.5391
Test details	Mean rank 1	Mean rank 2	Mean rank diff,	n1	n2	Z
ZI vs. ZIId	8	5	3	3	3	1.342
ZI vs. ZIIp	8	2	6	3	3	2.683
ZIId vs. ZIIp	5	2	3	3	3	1.342
Kruskal-Wallis test
P value	0.0036
Exact or approximate P value?	Exact
P value summary	**
Do the medians vary signif. (P < 0.05)?	Yes
Number of groups	3
Kruskal-Wallis statistic	7.2
Data summary
Number of treatments (columns)	3
Number of values (total)	9
Compact letter display
ZI	A
ZIId	A B
ZIIp	B

## Sheet: Normality_H3.1 (2)
	ZI	ZIId	ZIIp
Test for normal distribution
Shapiro-Wilk test
W	0.9256	0.9997	0.9765
P value	0.4725	0.9685	0.7063
Passed normality test (alpha=0.05)?	Yes	Yes	Yes
P value summary	ns	ns	ns
Kolmogorov-Smirnov test
KS distance	N too small	N too small	N too small
P value
Passed normality test (alpha=0.05)?
P value summary
Number of values	3	3	3

## Sheet: Kruskal-Wallis_H3.1 (2)
Number of families	1
Number of comparisons per family	3
Alpha	0.05
Dunn's multiple comparisons test	Mean rank diff,	Significant?	Summary	Adjusted P Value
ZI vs. ZIId	3	No	ns	0.5391
ZI vs. ZIIp	6	Yes	*	0.0219
ZIId vs. ZIIp	3	No	ns	0.5391
Test details	Mean rank 1	Mean rank 2	Mean rank diff,	n1	n2	Z
ZI vs. ZIId	8	5	3	3	3	1.342
ZI vs. ZIIp	8	2	6	3	3	2.683
ZIId vs. ZIIp	5	2	3	3	3	1.342
Kruskal-Wallis test
P value	0.0036
Exact or approximate P value?	Exact
P value summary	**
Do the medians vary signif. (P < 0.05)?	Yes
Number of groups	3
Kruskal-Wallis statistic	7.2
Data summary
Number of treatments (columns)	3
Number of values (total)	9
Compact letter display
ZI	A
ZIId	A B
ZIIp	B

## Sheet: Normality_H3.3
	ZI	ZIId	ZIIp	IZ	ZIII
Test for normal distribution
Shapiro-Wilk test
W	0.9605	1	0.9794	0.8447	0.8866
P value	0.6178	>0,9999	0.7248	0.2264	0.344
Passed normality test (alpha=0.05)?	Yes	Yes	Yes	Yes	Yes
P value summary	ns	ns	ns	ns	ns
Kolmogorov-Smirnov test
KS distance	N too small	N too small	N too small	N too small	N too small
P value
Passed normality test (alpha=0.05)?
P value summary
Number of values	3	3	3	3	3

## Sheet: Kruskal-Wallis_H3.3
Number of families	1
Number of comparisons per family	10
Alpha	0.05
Dunn's multiple comparisons test	Mean rank diff,	Significant?	Summary	Adjusted P Value
ZI vs. ZIId	-1.667	No	ns	>0,9999
ZI vs. ZIIp	3	No	ns	>0,9999
ZI vs. IZ	-0.3333	No	ns	>0,9999
ZI vs. ZIII	0.6667	No	ns	>0,9999
ZIId vs. ZIIp	4.667	No	ns	>0,9999
ZIId vs. IZ	1.333	No	ns	>0,9999
ZIId vs. ZIII	2.333	No	ns	>0,9999
ZIIp vs. IZ	-3.333	No	ns	>0,9999
ZIIp vs. ZIII	-2.333	No	ns	>0,9999
IZ vs. ZIII	1	No	ns	>0,9999
Test details	Mean rank 1	Mean rank 2	Mean rank diff,	n1	n2	Z
ZI vs. ZIId	8.333	10	-1.667	3	3	0.4564
ZI vs. ZIIp	8.333	5.333	3	3	3	0.8216
ZI vs. IZ	8.333	8.667	-0.3333	3	3	0.09129
ZI vs. ZIII	8.333	7.667	0.6667	3	3	0.1826
ZIId vs. ZIIp	10	5.333	4.667	3	3	1.278
ZIId vs. IZ	10	8.667	1.333	3	3	0.3651
ZIId vs. ZIII	10	7.667	2.333	3	3	0.639
ZIIp vs. IZ	5.333	8.667	-3.333	3	3	0.9129
ZIIp vs. ZIII	5.333	7.667	-2.333	3	3	0.639
IZ vs. ZIII	8.667	7.667	1	3	3	0.2739
Kruskal-Wallis test
P value	0.8203
Exact or approximate P value?	Exact
P value summary	ns
Do the medians vary signif. (P < 0.05)?	No
Number of groups	5
Kruskal-Wallis statistic	1.767
Data summary
Number of treatments (columns)	5
Number of values (total)	15
Compact letter display
IZ	A
ZIII	A
ZIId	A
ZI	A
ZIIp	A
