# Supplementary material for: Competence for transcellular infection in the root cortex involves a post-replicative, cell-cycle exit decision in Medicago truncatula
Source: eLife. 2025 Jul 4;12:RP88588. doi: 10.7554/eLife.88588 (PMC12227204; doi:10.7554/eLife.88588)
Supplement: Figure 2—source data 1. [file elife-88588-fig2-data1.xlsx]

## Sheet: Values
Figure 2 – source data 1
Nuclear area and statistical analyses.
	NC	IC
plant 1	84.361	250.636
plant 2	139.593	206.399
plant 3	91.642	154.721
plant 4	91.664	139.484
plant 5	91.059	121.479
plant 6	132.66	171.824
plant 6	118.025	157.615
plant 6	115.684	179.273
plant 6	90.593	156.502
plant 7	99.724	190.728
plant 7	113.604	191.204
plant 7	120.681	143.096
plant 7	63.472	101.611
plant 7	111.375	106.23
plant 8	105.982	181.954
plant 8	164.36	182.42
plant 8	132.004	134.805
plant 8	121.411	164.111
plant 9	140.959	266.188
plant 10	126.145	173.96
plant 11	77.353	162.661
plant 11	135.986	131.774
plant 12	151.046	166.956
plant 12	145.135	164.893
plant 12	112.364	137.004
plant 13	119.418	175.683
plant 13	122.726	165.555

## Sheet: Descriptive statistics
	NC	IC
Number of values	27	27
Minimum	63.47	101.6
25% Percentile	91.66	139.5
Median	118	164.9
75% Percentile	132.7	182
Maximum	164.4	266.2
Range	100.9	164.6
Mean	115.5	165.9
Std. Deviation	23.9	36.79
Std. Error of Mean	4.599	7.08
Lower 95% CI of mean	106.1	151.3
Upper 95% CI of mean	125	180.4

## Sheet: Normality
	NC	IC
Test for normal distribution
Shapiro-Wilk test
W	0.988	0.9328
P value	0.9841	0.081
Passed normality test (alpha=0.05)?	Yes	Yes
P value summary	ns	ns
Kolmogorov-Smirnov test
KS distance	0.1002	0.1413
P value	>0,1000	>0,1000
Passed normality test (alpha=0.05)?	Yes	Yes
P value summary	ns	ns
Number of values	27	27

## Sheet: Unpaired t-test
Column B	IC
vs.	vs,
Column A	NC
Unpaired t test with Welch's correction
P value	<0,0001
P value summary	****
Significantly different (P < 0.05)?	Yes
One- or two-tailed P value?	Two-tailed
Welch-corrected t, df	t=5,965, df=44,63
How big is the difference?
Mean of column A	115.5
Mean of column B	165.9
Difference between means (B - A) ± SEM	50,36 ± 8,443
95% confidence interval	33,35 to 67,37
R squared (eta squared)	0.4436
F test to compare variances
F, DFn, Dfd	2,370, 26, 26
P value	0.0318
P value summary	*
Significantly different (P < 0.05)?	Yes
Data analyzed
Sample size, column A	27
Sample size, column B	27
