# Supplementary material for: Competence for transcellular infection in the root cortex involves a post-replicative, cell-cycle exit decision in Medicago truncatula
Source: eLife. 2025 Jul 4;12:RP88588. doi: 10.7554/eLife.88588 (PMC12227204; doi:10.7554/eLife.88588)
Supplement: Figure 2—source data 2. [file elife-88588-fig2-data2.xlsx]

## Sheet: Values
Figure 2 – source data 2
Corrected total H3.1 nuclear fluorescence and statistical analyses.
	NC	IC
plant 1	825.377	1396.75
plant 2	4611.71	3204.41
plant 3	2735.6	401.028
plant 4	7187.57	3010.46
plant 5	1724.01	276.519
plant 6	1943.52	901.523
plant 6	1570.55	581.699
plant 6	815.748	514.33
plant 6	1447.46	931.525
plant 7	1109.89	297.992
plant 7	1800.31	555.424
plant 7	2687.09	791.25
plant 7	857.071	388.191
plant 7	1898.19	526.179
plant 8	1952.42	477.069
plant 8	2977.7	851.223
plant 8	2194.99	309.236
plant 8	2257.95	703.159
plant 9	2484.61	1193.13
plant 10	2436.45	688.044
plant 11	1572.94	1120.45
plant 11	2571.83	5213.78
plant 12	661.559	342.947
plant 12	1596.35	789.387
plant 12	5904.59	3155.36
plant 13	1983.79	169.454
plant 13	3672.77	449.405

## Sheet: Descriptive statistics
	NC	IC
Number of values	27	27
Minimum	661.6	169.5
25% Percentile	1571	401
Median	1952	688
75% Percentile	2687	1120
Maximum	7188	5214
Range	6526	5044
Mean	2351	1083
Std. Deviation	1505	1183
Std. Error of Mean	289.7	227.7
Lower 95% CI of mean	1756	614.9
Upper 95% CI of mean	2947	1551

## Sheet: Normality
	NC	IC
Test for normal distribution
Shapiro-Wilk test
W	0.8144	0.6715
P value	0.0002	<0,0001
Passed normality test (alpha=0.05)?	No	No
P value summary	***	****
Kolmogorov-Smirnov test
KS distance	0.214	0.2917
P value	0.0026	<0,0001
Passed normality test (alpha=0.05)?	No	No
P value summary	**	****
Number of values	27	27

## Sheet: Mann-Whitney
Column B	IC
vs.	vs,
Column A	NC
Mann Whitney test
P value	<0,0001
Exact or approximate P value?	Exact
P value summary	****
Significantly different (P < 0.05)?	Yes
One- or two-tailed P value?	Two-tailed
Sum of ranks in column A,B	983 , 502
Mann-Whitney U	124
Difference between medians
Median of column A	1952, n=27
Median of column B	688,0, n=27
Difference: Actual	-1264
Difference: Hodges-Lehmann	-1253
