# Supplementary material for: Competence for transcellular infection in the root cortex involves a post-replicative, cell-cycle exit decision in Medicago truncatula
Source: eLife. 2025 Jul 4;12:RP88588. doi: 10.7554/eLife.88588 (PMC12227204; doi:10.7554/eLife.88588)
Supplement: Figure 3—source data 1. [file elife-88588-fig3-data1.xlsx]

## Sheet: Values
Figure 3 – source data 1
Nuclear area and statistical analyses.
	WT		* : Data presented in Figure 2C				daphne-like					nf-ya1-1
	NC	IC					NC	IC				NC	IC
plant 1	84.361	250.636	*	a		plant 1	70.534	109.829			plant 1	152.153	152.153
plant 2	139.593	206.399	*	a		plant 1	34.308	67.889			plant 1	71.609	93.438
plant 3	91.642	154.721	*	a		plant 1	38.691	104.411			plant 1	107.732	178.154
plant 4	91.664	139.484	*	a		plant 1	77.057	72.005			plant 2	98.924	162.364
plant 5	91.059	121.479	*	a		plant 1	85.272	69.091			plant 2	69.13	104.695
plant 6	132.66	171.824	*	a		plant 2	157.861	123.058			plant 2	110.129	197.952
plant 6	118.025	157.615	*	a		plant 3	73.877	132.74			plant 2	86.766	143.075
plant 6	115.684	179.273	*	a		plant 4	115.521	112.614			plant 3	131.737	93.845
plant 6	90.593	156.502	*	a		plant 4	76.358	91.345			plant 3	102.676	112.479
plant 7	99.724	190.728	*	a		plant 4	85.19	126.609			plant 3	128.115	179.236
plant 7	113.604	191.204	*	a		plant 4	151.015	187.255			plant 3	78.471	186.731
plant 7	120.681	143.096	*	a		plant 4	88.49	260.832			plant 3	83.032	165.668
plant 7	63.472	101.611	*	a		plant 5	65.756	147.164			plant 3	79.735	130.867
plant 7	111.375	106.23	*	a		plant 6	90.284	144.355			plant 4	124.546	146.456
plant 8	105.982	181.954	*	a		plant 7	101.989	161.598			plant 4	99.747	235.72
plant 8	164.36	182.42	*	a		plant 8	84.564	157.904			plant 4	104.645	190.612
plant 8	132.004	134.805	*	a		plant 8	77.917	172.711			plant 5	151.888	203.484
plant 8	121.411	164.111	*	a		plant 9	104.644	214.132			plant 6	146.471	165.075
plant 9	140.959	266.188	*	a		plant 10	160.337	203.476			plant 7	165.915	228.013
plant 10	126.145	173.96	*	a							plant 8	58.444	106.32
plant 11	77.353	162.661	*	a							plant 8	64.599	158.434
plant 11	135.986	131.774	*	a							plant 8	110.494	94.536
plant 12	151.046	166.956	*	a							plant 9	108.557	189.36
plant 12	145.135	164.893	*	a							plant 9	109.412	251.932
plant 12	112.364	137.004	*	a							plant 9	141.539	206.923
plant 12	115.983	164.213		b							plant 10	149.902	244.632
plant 13	119.418	175.683	*	a							plant 10	111.276	118.996
plant 13	122.726	165.555	*	a							plant 10	132.382	173.083
plant 14	80.231	92.616		b							plant 10	120.185	106.662
plant 14	90.085	91.88		b							plant 10	67.301	107.841
plant 14	97.104	112.698		b							plant 11	104.811	187.959
plant 14	59.666	104.052		b							plant 11	112.046	158.176
plant 15	54.213	119.156		b							plant 11	113.749	241.696
plant 15	130.729	110.753		b							plant 11	109.831	166.545
plant 16	31.686	134.97		b							plant 11	136.793	251.741
plant 17	75.42	96.423		b							plant 11	142.491	212.38
plant 18	78.7	136.678		b							plant 12	157.26	192.682
plant 18	104.219	171.487		b							plant 13	162.745	290.156
plant 18	148.788	167.195		b							plant 13	105.797	157.517
plant 19	184.852	200.964		b
plant 20	107.86	143.156		b
plant 20	75.936	218.572		b
plant 21	106.104	110.712		b
a: infection events with visible signs of inner cortical cell divisions
b: all infection events independent of signs of inner cortical cell divisions

## Sheet: Descriptive statistics
	WT		daphne-like		nf-ya1-1
	NC	IC	NC	IC	NC	IC
Number of values	43	43	19	19	39	39
Minimum	31.69	91.88	34.31	67.89	58.44	93.44
25% Percentile	90.09	121.5	73.88	104.4	98.92	130.9
Median	111.4	157.6	85.19	132.7	110.1	166.5
75% Percentile	130.7	175.7	104.6	172.7	136.8	203.5
Maximum	184.9	266.2	160.3	260.8	165.9	290.2
Range	153.2	174.3	126	192.9	107.5	196.7
Mean	108.4	154.8	91.56	139.9	113.2	171.5
Std. Deviation	30.76	39.89	34.78	52.15	28.95	50.37
Std. Error of Mean	4.691	6.082	7.98	11.96	4.635	8.066
Lower 95% CI of mean	98.92	142.5	74.8	114.8	103.8	155.1
Upper 95% CI of mean	117.9	167	108.3	165.1	122.5	187.8

## Sheet: Normality
	WT		daphne-like		nf-ya1-1
	NC	IC	NC	IC	NC	IC
Test for normal distribution
Shapiro-Wilk test
W	0.9954	0.9588	0.9054	0.9625	0.9667	0.9663
P value	0.9998	0.1249	0.0609	0.6228	0.2954	0.2864
Passed normality test (alpha=0.05)?	Yes	Yes	Yes	Yes	Yes	Yes
P value summary	ns	ns	ns	ns	ns	ns
Kolmogorov-Smirnov test
KS distance	0.05546	0.08114	0.1989	0.08351	0.1072	0.08438
P value	>0,1000	>0,1000	0.0464	>0,1000	>0,1000	>0,1000
Passed normality test (alpha=0.05)?	Yes	Yes	No	Yes	Yes	Yes
P value summary	ns	ns	*	ns	ns	ns
Number of values	43	43	19	19	39	39

## Sheet: Kruskal-Wallis
Number of families	1
Number of comparisons per family	15
Alpha	0.05
Dunn's multiple comparisons test	Mean rank diff,	Significant?	Summary	Adjusted P Value
NC (WT) vs. IC (WT)	-60.28	Yes	****	<0,0001
NC (WT) vs. NC (daphne-like)	25.16	No	ns	>0,9999
NC (WT) vs. IC (daphne-like)	-37.05	No	ns	0.3211
NC (WT) vs. NC (nf-ya1-1)	-5.82	No	ns	>0,9999
NC (WT) vs. IC (nf-ya1-1)	-72.79	Yes	****	<0,0001
IC (WT) vs. NC (daphne-like)	85.44	Yes	****	<0,0001
IC (WT) vs. IC (daphne-like)	23.23	No	ns	>0,9999
IC (WT) vs. NC (nf-ya1-1)	54.46	Yes	***	0.0004
IC (WT) vs. IC (nf-ya1-1)	-12.52	No	ns	>0,9999
NC (daphne-like) vs. IC (daphne-like)	-62.21	Yes	*	0.0156
NC (daphne-like) vs. NC (nf-ya1-1)	-30.98	No	ns	0.8726
NC (daphne-like) vs. IC (nf-ya1-1)	-97.96	Yes	****	<0,0001
IC (daphne-like) vs. NC (nf-ya1-1)	31.23	No	ns	0.843
IC (daphne-like) vs. IC (nf-ya1-1)	-35.75	No	ns	0.4326
NC (nf-ya1-1) vs. IC (nf-ya1-1)	-66.97	Yes	****	<0,0001
Test details	Mean rank 1	Mean rank 2	Mean rank diff,	n1	n2	Z
NC (WT) vs. IC (WT)	72.37	132.7	-60.28	43	43	4.781
NC (WT) vs. NC (daphne-like)	72.37	47.21	25.16	43	19	1.562
NC (WT) vs. IC (daphne-like)	72.37	109.4	-37.05	43	19	2.301
NC (WT) vs. NC (nf-ya1-1)	72.37	78.19	-5.82	43	39	0.4503
NC (WT) vs. IC (nf-ya1-1)	72.37	145.2	-72.79	43	39	5.632
IC (WT) vs. NC (daphne-like)	132.7	47.21	85.44	43	19	5.306
IC (WT) vs. IC (daphne-like)	132.7	109.4	23.23	43	19	1.443
IC (WT) vs. NC (nf-ya1-1)	132.7	78.19	54.46	43	39	4.213
IC (WT) vs. IC (nf-ya1-1)	132.7	145.2	-12.52	43	39	0.9682
NC (daphne-like) vs. IC (daphne-like)	47.21	109.4	-62.21	19	19	3.28
NC (daphne-like) vs. NC (nf-ya1-1)	47.21	78.19	-30.98	19	39	1.894
NC (daphne-like) vs. IC (nf-ya1-1)	47.21	145.2	-97.96	19	39	5.99
IC (daphne-like) vs. NC (nf-ya1-1)	109.4	78.19	31.23	19	39	1.909
IC (daphne-like) vs. IC (nf-ya1-1)	109.4	145.2	-35.75	19	39	2.186
NC (nf-ya1-1) vs. IC (nf-ya1-1)	78.19	145.2	-66.97	39	39	5.059
Kruskal-Wallis test
P value	<0,0001
Exact or approximate P value?	Approximate
P value summary	****
Do the medians vary signif. (P < 0.05)?	Yes
Number of groups	6
Kruskal-Wallis statistic	67.59
Data summary
Number of treatments (columns)	6
Number of values (total)	202
Compact letter display
IC (nf-ya1-1)	A
IC (WT)	A
IC (daphne-like)	A B
NC (nf-ya1-1)	B C
NC (WT)	B C
NC (daphne-like)	C
