# Supplementary material for: Competence for transcellular infection in the root cortex involves a post-replicative, cell-cycle exit decision in Medicago truncatula
Source: eLife. 2025 Jul 4;12:RP88588. doi: 10.7554/eLife.88588 (PMC12227204; doi:10.7554/eLife.88588)
Supplement: Figure 3—source data 2. [file elife-88588-fig3-data2.xlsx]

## Sheet: Values
Figure 3 – source data 2
Relative H3.1 corrected total nuclear fluorescence and statistical analyses.
	WT			daphne-like			nf-ya1-1
	IC / NC			IC / NC			IC / NC
plant 1	1.69226		plant 1	0.313173		plant 1	0.135296
plant 2	0.694843		plant 1	1.29767		plant 1	0.10983
plant 3	0.146596		plant 1	5.80941		plant 1	1.9659
plant 4	0.418843		plant 1	0.169538		plant 2	4.00655
plant 5	0.160393		plant 1	0.0827898		plant 2	0.736529
plant 6	0.46386		plant 2	1.44717		plant 2	4.58472
plant 6	0.370378		plant 3	4.96327		plant 2	0.598849
plant 6	0.630501		plant 4	2.29354		plant 3	0.0307451
plant 6	0.64356		plant 4	3.60265		plant 3	1.32122
plant 7	0.268488		plant 4	0.262235		plant 3	3.59244
plant 7	0.308515		plant 4	0.512533		plant 3	7.48017
plant 7	0.294463		plant 4	21.4697		plant 3	6.56996
plant 7	0.452928		plant 5	0.585845		plant 3	4.35239
plant 7	0.277199		plant 6	8.38161		plant 4	0.333639
plant 8	0.244347		plant 7	0.316955		plant 4	11.3593
plant 8	0.285866		plant 8	5.95071		plant 4	0.394941
plant 8	0.140882		plant 8	0.687398		plant 5	17.9738
plant 8	0.311415		plant 9	1.30963		plant 6	1.00811
plant 9	0.48021		plant 10	0.146547		plant 7	0.232225
plant 10	0.282395					plant 8	2.42108
plant 11	0.712325					plant 8	1.05869
plant 11	2.02727					plant 8	1.35926
plant 12	0.518393					plant 9	1.04027
plant 12	0.494496					plant 9	0.869336
plant 12	0.534392					plant 9	0.580977
plant 12	0.462469					plant 10	0.367228
plant 13	0.0854192					plant 10	2.15701
plant 13	0.122361					plant 10	0.985036
plant 14	0.417719					plant 10	0.61174
plant 14	0.451576					plant 10	0.643237
plant 14	0.39647					plant 11	8.77684
plant 14	0.475006					plant 11	0.270342
plant 15	1.38049					plant 11	0.154017
plant 15	0.417778					plant 11	0.376332
plant 16	0.150861					plant 11	0.629196
plant 17	0.6668					plant 11	0.514049
plant 18	9.47869					plant 12	0.660523
plant 18	0.118297					plant 13	0.302346
plant 18	0.233628					plant 13	0.385968
plant 19	0.416793
plant 20	0.283827
plant 20	1.2288
plant 21	0.266587

## Sheet: Descriptive statistics
	WT	daphne-like	nf-ya1-1
Number of values	43	19	39
Minimum	0.08542	0.08279	0.03075
25% Percentile	0.2685	0.3132	0.3763
Median	0.4177	1.298	0.7365
75% Percentile	0.5344	4.963	2.421
Maximum	9.479	21.47	17.97
Range	9.393	21.39	17.94
Mean	0.6955	3.137	2.332
Std. Deviation	1.429	5.073	3.671
Std. Error of Mean	0.2179	1.164	0.5878
Lower 95% CI of mean	0.2558	0.6921	1.142
Upper 95% CI of mean	1.135	5.582	3.522

## Sheet: Normality
	WT	daphne-like	nf-ya1-1
Test for normal distribution
Shapiro-Wilk test
W	0.3271	0.6228	0.6253
P value	<0,0001	<0,0001	<0,0001
Passed normality test (alpha=0.05)?	No	No	No
P value summary	****	****	****
Kolmogorov-Smirnov test
KS distance	0.379	0.2736	0.2968
P value	<0,0001	0.0006	<0,0001
Passed normality test (alpha=0.05)?	No	No	No
P value summary	****	***	****
Number of values	43	19	39

## Sheet: Kruskal-Wallis
Number of families	1
Number of comparisons per family	3
Alpha	0.05
Dunn's multiple comparisons test	Mean rank diff,	Significant?	Summary	Adjusted P Value
WT vs. daphne-like	-20.94	Yes	*	0.0285
WT vs. nf-ya1-1	-20.03	Yes	**	0.006
daphne-like vs. nf-ya1-1	0.9042	No	ns	>0,9999
Test details	Mean rank 1	Mean rank 2	Mean rank diff,	n1	n2	Z
WT vs. daphne-like	39.33	60.26	-20.94	43	19	2.594
WT vs. nf-ya1-1	39.33	59.36	-20.03	43	39	3.092
daphne-like vs. nf-ya1-1	60.26	59.36	0.9042	19	39	0.1103
Kruskal-Wallis test
P value	0.0026
Exact or approximate P value?	Approximate
P value summary	**
Do the medians vary signif. (P < 0.05)?	Yes
Number of groups	3
Kruskal-Wallis statistic	11.9
Data summary
Number of treatments (columns)	3
Number of values (total)	101
Compact letter display
daphne-like	A
nf-ya1-1	A
WT	B
