# Supplementary material for: Competence for transcellular infection in the root cortex involves a post-replicative, cell-cycle exit decision in Medicago truncatula
Source: eLife. 2025 Jul 4;12:RP88588. doi: 10.7554/eLife.88588 (PMC12227204; doi:10.7554/eLife.88588)
Supplement: Figure 5—figure supplement 1—source data 1. [file elife-88588-fig5-figsupp1-data1.xlsx]

## Sheet: Values
Figure 5 – figure supplement 1 – source data 1
GUS activity and statistical analysis.
	pKNOLLE			pCYCB1;2			pKNOLLE (mutMSA1-3)
leaf 1	258.045		leaf 1	324.833		leaf 1	8.93133
leaf 2	230.437		leaf 2	350.2		leaf 2	3.492
leaf 3	182.927		leaf 3	331.979		leaf 3	2.46044
leaf 4	338.037		leaf 4	307.494		leaf 4	11.8673
leaf 5	305.605		leaf 5	294.594		leaf 5	13.214
leaf 6	335.707		leaf 6	230.637		leaf 6	4.49533

## Sheet: Descriptive statistics
	pKNOLLE	pCYCB1;2	pKNOLLE (mutMSA1-3)
Number of values	6	6	6
Minimum	182.9	230.6	2.46
25% Percentile	218.6	278.6	3.234
Median	281.8	316.2	6.713
75% Percentile	336.3	336.5	12.2
Maximum	338	350.2	13.21
Range	155.1	119.6	10.75
Mean	275.1	306.6	7.41
Std. Deviation	62.2	41.94	4.565
Std. Error of Mean	25.39	17.12	1.864
Lower 95% CI of mean	209.8	262.6	2.619
Upper 95% CI of mean	340.4	350.6	12.2

## Sheet: Normality
	pKNOLLE	pCYCB1;2	pKNOLLE (mutMSA1-3)
Test for normal distribution
Shapiro-Wilk test
W	0.9209	0.8988	0.8948
P value	0.5121	0.3671	0.3443
Passed normality test (alpha=0.05)?	Yes	Yes	Yes
P value summary	ns	ns	ns
Kolmogorov-Smirnov test
KS distance	0.1879	0.2205	0.2384
P value	>0,1000	>0,1000	>0,1000
Passed normality test (alpha=0.05)?	Yes	Yes	Yes
P value summary	ns	ns	ns
Number of values	6	6	6

## Sheet: Brown-Forsythe
Number of families	1
Number of comparisons per family	2
Alpha	0.05
Dunnett's T3 multiple comparisons test	Mean Diff,	95,00% CI of diff,	Below threshold?	Summary	Adjusted P Value
pKNOLLE vs. pCYCB1;2	-31.5	-112,9 to 49,87	No	ns	0.539
pKNOLLE vs. pKNOLLE (mutMSA1-3)	267.7	189,0 to 346,4	Yes	***	0.0003
Test details	Mean 1	Mean 2	Mean Diff,	SE of diff,	n1	n2	t	DF
pKNOLLE vs. pCYCB1;2	275.1	306.6	-31.5	30.63	6	6	1.028	8.767
pKNOLLE vs. pKNOLLE (mutMSA1-3)	275.1	7.41	267.7	25.46	6	6	10.51	5.054
Brown-Forsythe ANOVA test
F* (DFn, DFd)	86,14 (2,000, 8,832)
P value	<0,0001
P value summary	****
Significant diff. among means (P < 0.05)?	Yes
Welch's ANOVA test
W (DFn, DFd)	186,4 (2,000, 6,780)
P value	<0,0001
P value summary	****
Significant diff. among means (P < 0.05)?	Yes
Data summary
Number of treatments (columns)	3
Number of values (total)	18
