# Supplementary material for: Competence for transcellular infection in the root cortex involves a post-replicative, cell-cycle exit decision in Medicago truncatula
Source: eLife. 2025 Jul 4;12:RP88588. doi: 10.7554/eLife.88588 (PMC12227204; doi:10.7554/eLife.88588)
Supplement: Figure 5—figure supplement 3—source data 1. [file elife-88588-fig5-figsupp3-data1.xlsx]

## Sheet: Values
Figure 5 – figure supplement 3 – source data 1
Nuclear area and statistical analysis.
	CDT1a RT			N-CYCB1;1 RT			CDT1a NOD			N-CYCB1;1 NOD
plant 1	40.723		plant 1	67.101		plant 1	134.746		plant 1	173.195
plant 1	36.515		plant 1	65.19		plant 1	153		plant 1	189.161
plant 1	35.129		plant 1	79.703		plant 2	107.654		plant 2	187.529
plant 1	36.712		plant 1	54.105		plant 2	149.003		plant 2	160.206
plant 1	35.035		plant 1	50.306		plant 2	138.803		plant 2	261.849
plant 1	38.849		plant 1	55.52		plant 2	146.453		plant 2	201.191
plant 1	41.306		plant 1	52.275		plant 2	133.52		plant 2	182.483
plant 1	47.403		plant 1	45.828		plant 2	118.583		plant 2	163.576
plant 1	41.416		plant 1	48.315		plant 2	116.1		plant 2	156.854
plant 1	34.802		plant 1	70.396		plant 4	55.341		plant 2	177.231
plant 1	36.611		plant 1	59.683		plant 4	76.773		plant 3	249.105
plant 1	37.98		plant 1	55.794		plant 4	80.079		plant 3	202.809
plant 1	35.689		plant 1	64.149		plant 4	94.998		plant 3	220.991
plant 1	44.241		plant 1	66.615		plant 4	54.557		plant 3	209.939
plant 1	44.762		plant 1	65.429		plant 4	97.499		plant 3	190.866
plant 1	45.521		plant 1	78.852		plant 7	97.9		plant 3	215.324
plant 1	49.085		plant 1	70.369		plant 7	100.633		plant 3	230.296
plant 1	41.706		plant 1	63.03		plant 7	146.37		plant 3	198.181
plant 1	38.33		plant 1	87.038		plant 8	77.259		plant 3	285.499
plant 1	35.172		plant 1	66.673		plant 8	122.589		plant 3	326.53
plant 1	36.119		plant 1	61.552		plant 8	115.316		plant 3	195.895
plant 1	36.713		plant 1	63.944		plant 8	89.057		plant 3	166.636
plant 1	33.615		plant 1	68.997		plant 8	106.926		plant 3	199.895
plant 1	34.735		plant 1	48.437		plant 8	129.605		plant 3	201.838
plant 1	33.773		plant 1	47.271		plant 8	153.459		plant 3	301.614
plant 1	31.118		plant 1	54.431		plant 8	145.555		plant 4	136.41
plant 1	28.764		plant 1	50.362		plant 8	138.081		plant 4	108.622
plant 1	29.975		plant 1	53.122		plant 8	88.942		plant 4	139.915
plant 2	34.859		plant 2	63.349		plant 8	144.467		plant 4	105.135
plant 2	37.436		plant 2	62.766		plant 8	134.559		plant 4	113.086
plant 2	38.765		plant 2	59.946		plant 8	110.305		plant 5	142.759
plant 2	45.717		plant 2	60.821		plant 8	138.299		plant 5	112.615
plant 2	32.947		plant 2	60.821		plant 8	194.382		plant 5	162.454
plant 2	42.589		plant 2	68.551		plant 8	125.768		plant 6	92.984
plant 2	42.054		plant 2	78.113		plant 8	133.332		plant 7	197.658
plant 2	49.671		plant 2	69.75		plant 8	86.846		plant 7	121.813
plant 2	43.626		plant 2	75.001		plant 8	126.378		plant 7	288.129
plant 2	46.673		plant 2	90.235		plant 8	120.398		plant 7	253.653
plant 3	31.32		plant 3	51.155		plant 8	102.163		plant 7	198.991
plant 3	36.568		plant 3	57.795		plant 9	126.47		plant 7	194.175
plant 3	31.178		plant 3	55.909		plant 9	116.229		plant 7	161.543
plant 3	39.888		plant 3	49.772		plant 9	96.612		plant 7	254.132
plant 3	34.447		plant 3	79.784		plant 9	123.05		plant 8	122.933
plant 3	33.559		plant 3	54.651		plant 9	84.13		plant 8	122.532
plant 3	43.518		plant 3	54.651		plant 9	111.02		plant 8	204.144
plant 3	50.988		plant 3	87.799		plant 9	91.521		plant 8	221.125
plant 3	49.663		plant 3	74.847		plant 9	90.243		plant 8	253.981
plant 3	37.853		plant 3	53.296		plant 9	108.425		plant 8	256.273
plant 3	37.794		plant 3	99.064		plant 9	121.696		plant 8	146.072
plant 3	38.392		plant 3	75.084		plant 9	99.463		plant 8	137.806
plant 3	58.761		plant 3	72.281		plant 9	118.528		plant 8	187.112
plant 3	54.492		plant 3	75.6		plant 9	168.959		plant 8	146.607
plant 3	33.596		plant 3	78.32		plant 9	131.828		plant 9	152.141
plant 3	32.822		plant 3	70.64		plant 9	178.435		plant 9	158.569
plant 3	29.679		plant 3	51.819		plant 9	110.594		plant 9	186.973
plant 3	35.32		plant 3	56.275		plant 9	83.395		plant 9	234.404
plant 3	46.495		plant 3	64.671		plant 9	91.815		plant 9	143.08
plant 3	42.028		plant 3	59.819		plant 9	89.845		plant 9	232.547
plant 3	42.088		plant 3	55.166		plant 9	115.075		plant 9	251.127
plant 3	36.258		plant 3	53.688					plant 9	169.416
plant 3	36.184		plant 3	58.495
plant 3	31.303		plant 3	59.939
plant 3	33.985		plant 3	59.244
plant 3	32.788		plant 3	73.064
plant 3	43.913		plant 3	64.319
plant 3	47.911		plant 3	52.993
plant 3	46.848		plant 3	66.117
plant 4	41.582		plant 4	65.579
plant 4	41.636		plant 4	60.378
plant 4	37.825		plant 4	68.862
plant 4	39.098		plant 4	65.597
plant 4	36.489		plant 4	68.162
plant 4	40.47		plant 4	59.257
plant 4	47.07		plant 4	62.396
plant 4	43.448		plant 4	59.535
plant 4	48.46		plant 4	56.603
plant 4	41.654		plant 4	45.878
plant 5	42.225		plant 5	75.364
plant 5	39.286		plant 5	61.269
plant 5	38.597		plant 5	65.392
plant 5	38.537		plant 5	83.881
plant 5	42.84		plant 5	75.649
plant 5	42.54		plant 5	76.488
plant 5	42.105		plant 5	68.406
plant 5	35.403		plant 5	55.331
plant 5	44.385		plant 5	62.183
plant 5	36.482		plant 5	55.991
plant 6	41.507		plant 6	58.894
plant 6	38.591		plant 6	55.925
plant 6	35.384		plant 6	57.012
plant 6	46.171		plant 6	64.539
plant 6	41.666		plant 6	66.501
plant 6	43.494		plant 6	65.043
plant 6	42.805		plant 6	79.461
plant 6	43.812		plant 6	71.218
plant 6	48.61		plant 6	96.902
plant 6	37.61		plant 6	67.879
plant 7	40.16		plant 7	54.029
plant 7	36.028		plant 7	53.848
plant 7	42.006		plant 7	52.66
plant 7	31.379		plant 7	67.342
plant 7	39.166		plant 7	62.422
plant 7	33.807		plant 7	56.986
plant 7	35.795		plant 7	54.61
plant 7	37.28		plant 7	56.779
plant 7	34.117		plant 7	47.017
plant 7	30.475		plant 7	62.151
plant 7	39.411		plant 7	54.3
plant 7	42.161		plant 7	50.891
plant 7	37.965		plant 7	49.018
plant 7	35.46		plant 7	38.378
plant 7	35.989		plant 7	70.26
plant 7	39.333		plant 7	44.279
plant 7	44.098		plant 7	63.223
plant 7	38.184		plant 7	65.457
plant 7	39.179		plant 7	57.657
plant 7	37.203		plant 7	55.204
plant 8	39.587		plant 8	64.586
plant 8	46.548		plant 8	102.035
plant 8	40.737		plant 8	68.077
plant 8	52.339		plant 8	74.977
plant 8	48.203		plant 8	77.318
plant 8	46.003		plant 8	76.834
plant 8	50.604		plant 8	75.563
plant 8	45.095		plant 8	68.137
plant 8	48.344		plant 8	68.359
plant 8	44.066		plant 8	69.832
plant 9	36.033		plant 9	50.591
plant 9	38.546		plant 9	42.206
plant 9	23.727		plant 9	39.351
plant 9	24.33		plant 9	51.837
plant 9	27.769		plant 9	47.735
plant 9	42.146		plant 9	52.38
plant 9	39.31		plant 9	51.516
plant 9	31.669		plant 9	42.829
plant 9	30.463		plant 9	44.297
plant 9	36.828		plant 9	70.17
plant 9	37.048		plant 9	56.999
plant 9	42.73		plant 9	71.9
plant 9	39.643		plant 9	52.066
plant 9	38.894		plant 9	51.317
plant 9	33.69		plant 9	47.043
plant 9	32.025		plant 9	70.041
plant 9	36.622		plant 9	49.974
plant 9	37.655		plant 9	46.888
plant 9	31.108		plant 9	48.437
plant 9	34.129		plant 9	46.035
plant 9	36.97		plant 9	50.206
plant 9	27.88		plant 9	47.004
plant 9	40.444		plant 9	49.664
plant 9	38.326		plant 9	53.693
plant 9	36.105		plant 9	43.001
plant 9	39.592		plant 9	73.282
plant 9	38.597		plant 9	53.228
plant 9	39.992		plant 9	69.641
plant 9	48.515		plant 9	52.957
plant 10	47.053		plant 10	48.283
plant 10	40.313		plant 10	63.315
plant 10	43.885		plant 10	56.778
plant 10	44.894		plant 10	60.41
plant 10	39.849		plant 10	75.058
plant 10	37.751		plant 10	74.856
plant 10	34.22		plant 10	62.004
plant 10	55.749		plant 10	57
plant 10	42.533		plant 10	84.521
plant 10	50.321		plant 10	70.76
plant 10	48.29		plant 10	65.158
plant 10	42.107		plant 10	74.188
plant 10	47.701		plant 10	71.678
plant 10	44.883		plant 10	81.787
plant 10	61.751		plant 10	72.365
plant 10	52.496		plant 10	84.802
plant 10	61.863		plant 10	77.833
plant 10	46.692		plant 10	81.311
plant 10	46.411		plant 10	84.522
plant 10	45.163		plant 10	92.92

## Sheet: Descriptive statistics
	CDT1a RT	N-CYCB1;1 RT	CDT1a NOD	N-CYCB1;1 NOD
Number of values	176	176	59	60
Minimum	23.73	38.38	54.56	92.98
25% Percentile	36	53.69	95	148
Median	39.3	62.17	116.1	188.3
75% Percentile	43.91	70.39	134.6	221.1
Maximum	61.86	102	194.4	326.5
Range	38.14	63.66	139.8	233.5
Mean	40.06	62.92	116	189.3
Std. Deviation	6.433	12.18	27.9	52.33
Std. Error of Mean	0.4849	0.9185	3.632	6.756
Lower 95% CI of mean	39.11	61.11	108.7	175.8
Upper 95% CI of mean	41.02	64.73	123.3	202.8

## Sheet: Normality
	CDT1a RT	N-CYCB1;1 RT	CDT1a NOD	N-CYCB1;1 NOD
Test for normal distribution
Shapiro-Wilk test
W	0.98	0.976	0.9872	0.9791
P value	0.0125	0.0039	0.7932	0.3915
Passed normality test (alpha=0.05)?	No	No	Yes	Yes
P value summary	*	**	ns	ns
Kolmogorov-Smirnov test
KS distance	0.06009	0.07813	0.0479	0.08854
P value	>0,1000	0.0107	>0,1000	>0,1000
Passed normality test (alpha=0.05)?	Yes	No	Yes	Yes
P value summary	ns	*	ns	ns
Number of values	176	176	59	60

## Sheet: Kruskal-Wallis
Number of families	1
Number of comparisons per family	6
Alpha	0.05
Dunn's multiple comparisons test	Mean rank diff,	Significant?	Summary	Adjusted P Value
CDT1a RT vs. N-CYCB1;1 RT	-166.3	Yes	****	<0,0001
CDT1a RT vs. CDT1a NOD	-287.3	Yes	****	<0,0001
CDT1a RT vs. N-CYCB1;1 NOD	-341	Yes	****	<0,0001
N-CYCB1;1 RT vs. CDT1a NOD	-121	Yes	****	<0,0001
N-CYCB1;1 RT vs. N-CYCB1;1 NOD	-174.7	Yes	****	<0,0001
CDT1a NOD vs. N-CYCB1;1 NOD	-53.67	No	ns	0.189
Test details	Mean rank 1	Mean rank 2	Mean rank diff,	n1	n2	Z
CDT1a RT vs. N-CYCB1;1 RT	94.43	260.7	-166.3	176	176	11.46
CDT1a RT vs. CDT1a NOD	94.43	381.7	-287.3	176	59	14.03
CDT1a RT vs. N-CYCB1;1 NOD	94.43	435.4	-341	176	60	16.76
N-CYCB1;1 RT vs. CDT1a NOD	260.7	381.7	-121	176	59	5.91
N-CYCB1;1 RT vs. N-CYCB1;1 NOD	260.7	435.4	-174.7	176	60	8.585
CDT1a NOD vs. N-CYCB1;1 NOD	381.7	435.4	-53.67	59	60	2.151
Kruskal-Wallis test
P value	<0,0001
Exact or approximate P value?	Approximate
P value summary	****
Do the medians vary signif. (P < 0.05)?	Yes
Number of groups	4
Kruskal-Wallis statistic	392.6
Data summary
Number of treatments (columns)	4
Number of values (total)	471
Compact letter display
N-CYCB1;1 NOD	A
CDT1a NOD	A
N-CYCB1;1 RT	B
CDT1a RT	C
