# Supplementary material for: Competence for transcellular infection in the root cortex involves a post-replicative, cell-cycle exit decision in Medicago truncatula
Source: eLife. 2025 Jul 4;12:RP88588. doi: 10.7554/eLife.88588 (PMC12227204; doi:10.7554/eLife.88588)
Supplement: Figure 6—figure supplement 2—source data 1. [file elife-88588-fig6-figsupp2-data1.xlsx]

## Sheet: Values
Figure 6 – figure supplement 2 – source data 1
Number of CENH3 signals (root tip, lateral root primordia, nodule infection zone).
	RT	* : Data presented in Figure 6B				LRP			NOD (IZ) - NC			NOD (IZ) - IC
plant 1	16	*			plant 4	16		plant 1	30		plant 1	27
plant 1	14	*			plant 4	14		plant 1	29		plant 1	29
plant 1	13	*			plant 4	13		plant 1	32		plant 1	28
plant 1	16	*			plant 4	14		plant 1	27		plant 1	24
plant 1	14	*			plant 4	14		plant 1	27		plant 1	26
plant 2	15	*			plant 4	15		plant 1	28		plant 1	27
plant 2	16	*			plant 4	13		plant 1	28		plant 1	26
plant 2	14	*			plant 4	14		plant 1	15		plant 1	22
plant 2	13	*			plant 4	15		plant 1	25		plant 1	26
plant 2	13	*			plant 4	15		plant 1	26		plant 1	27
plant 3	15	*			plant 4	14		plant 1	24		plant 2	27
plant 3	15	*			plant 4	15		plant 1	28		plant 2	25
plant 3	16	*			plant 4	13		plant 1	27		plant 3	27
plant 3	16	*			plant 4	12		plant 1	29		plant 3	26
plant 3	14	*			plant 4	16		plant 1	32		plant 3	26
plant 3	15	*			plant 6	14		plant 1	30		plant 3	25
plant 3	16	*			plant 6	15		plant 1	30		plant 3	29
plant 3	15	*			plant 6	14		plant 1	29		plant 3	26
plant 3	14	*			plant 6	12		plant 1	30		plant 3	27
plant 3	14	*			plant 6	14		plant 1	29		plant 3	22
plant 3	15	*			plant 6	16		plant 1	27		plant 3	27
plant 3	15	*			plant 6	15		plant 1	30		plant 3	22
plant 3	13	*			plant 6	14		plant 3	29		plant 3	23
plant 3	16	*			plant 6	15		plant 3	29		plant 4	28
plant 3	15	*			plant 6	15		plant 3	27		plant 4	28
plant 3	15	*			plant 6	14		plant 3	28		plant 4	24
plant 3	15	*			plant 6	14		plant 3	28		plant 4	27
plant 3	13	*			plant 6	15		plant 3	29		plant 4	25
plant 3	15	*			plant 6	16		plant 3	29		plant 4	27
plant 3	15	*			plant 6	14		plant 3	27		plant 4	24
plant 3	15	*			plant 6	15		plant 3	28		plant 4	27
plant 3	16	*			plant 6	11		plant 3	28		plant 4	24
plant 3	15	*			plant 6	16		plant 3	28		plant 4	28
plant 3	15	*			plant 7	15		plant 3	29		plant 7	26
plant 3	12	*			plant 7	14		plant 3	29		plant 7	27
plant 4	12	*			plant 7	15		plant 3	31		plant 7	27
plant 4	13	*			plant 7	13		plant 3	26		plant 7	24
plant 4	14	*			plant 7	14		plant 3	29		plant 7	23
plant 4	16	*			plant 7	16		plant 3	14		plant 7	27
plant 4	16	*			plant 7	12		plant 3	25		plant 7	24
plant 5	15	*			plant 7	15					plant 7	27
plant 5	14	*			plant 7	16					plant 7	27
plant 5	15	*			plant 7	14					plant 8	25
plant 5	14	*			plant 8	15					plant 8	27
plant 5	15	*			plant 8	15					plant 8	31
plant 6	14	*			plant 8	14					plant 8	29
plant 6	15	*			plant 8	14					plant 8	19
plant 6	14	*			plant 8	15					plant 8	24
plant 6	16	*			plant 8	14					plant 8	29
plant 6	12	*			plant 8	16					plant 8	27
plant 7	14	*			plant 8	14					plant 8	26
plant 7	14	*			plant 8	14					plant 8	26
plant 7	15	*			plant 8	15					plant 8	27
plant 7	13	*			plant 8	16					plant 8	25
plant 7	14	*			plant 8	14					plant 8	24
											plant 8	29
											plant 8	28
											plant 8	24
											plant 9	24
											plant 9	28
											plant 10	29
											plant 10	27
											plant 11	26
											plant 11	28
											plant 11	30
											plant 11	30

## Sheet: Descriptive statistics
	RT	LRP	NOD (IZ)
Number of values	55	55	106
Minimum	12	11	14
25% Percentile	14	14	25.75
Median	15	14	27
75% Percentile	15	15	29
Maximum	16	16	32
Range	4	5	18
Mean	14.53	14.4	26.75
Std. Deviation	1.12	1.132	2.835
Std. Error of Mean	0.151	0.1526	0.2754
Lower 95% CI of mean	14.22	14.09	26.2
Upper 95% CI of mean	14.83	14.71	27.29
