# Supplementary material for: Competence for transcellular infection in the root cortex involves a post-replicative, cell-cycle exit decision in Medicago truncatula
Source: eLife. 2025 Jul 4;12:RP88588. doi: 10.7554/eLife.88588 (PMC12227204; doi:10.7554/eLife.88588)
Supplement: Figure 6—source data 1. [file elife-88588-fig6-data1.xlsx]

## Sheet: Values
Figure 6 – source data 1
Number of CENH3 signals (root tip) and statistical analysis.
	pCENH3			pUbi
plant 1	16		plant 1	16
plant 1	12		plant 1	14
plant 1	14		plant 1	13
plant 2	14		plant 1	16
plant 2	14		plant 1	14
plant 2	13		plant 2	15
plant 2	12		plant 2	16
plant 2	13		plant 2	14
plant 2	13		plant 2	13
plant 3	15		plant 2	13
plant 3	16		plant 3	15
plant 3	14		plant 3	15
plant 3	13		plant 3	16
plant 3	13		plant 3	16
plant 3	12		plant 3	14
plant 3	13		plant 3	15
plant 3	13		plant 3	16
plant 3	12		plant 3	15
plant 3	11		plant 3	14
plant 3	13		plant 3	14
plant 3	13		plant 3	15
plant 3	12		plant 3	15
plant 4	14		plant 3	13
plant 4	12		plant 3	16
plant 4	14		plant 3	15
plant 4	13		plant 3	15
plant 4	14		plant 3	15
plant 5	13		plant 3	13
plant 5	15		plant 3	15
plant 5	13		plant 3	15
plant 5	16		plant 3	15
plant 5	14		plant 3	16
plant 6	12		plant 3	15
plant 6	14		plant 3	15
plant 6	14		plant 3	12
plant 6	13		plant 4	12
plant 6	13		plant 4	13
plant 6	16		plant 4	14
plant 6	15		plant 4	16
plant 6	16		plant 4	16
plant 6	16		plant 5	15
plant 6	14		plant 5	14
plant 6	15		plant 5	15
plant 6	15		plant 5	14
plant 6	15		plant 5	15
plant 6	15		plant 6	14
plant 6	14		plant 6	15
plant 6	14		plant 6	14
plant 6	13		plant 6	16
plant 6	15		plant 6	12
plant 7	13		plant 7	14
plant 7	14		plant 7	14
plant 7	12		plant 7	15
plant 7	14		plant 7	13
plant 7	14		plant 7	14

## Sheet: Descriptive statistics
	pCENH3	pUbi
Number of values	55	55
Minimum	11	12
25% Percentile	13	14
Median	14	15
75% Percentile	15	15
Maximum	16	16
Range	5	4
Mean	13.73	14.53
Std. Deviation	1.254	1.12
Std. Error of Mean	0.1691	0.151
Lower 95% CI of mean	13.39	14.22
Upper 95% CI of mean	14.07	14.83

## Sheet: Normality
	pCENH3	pUbi
Test for normal distribution
Shapiro-Wilk test
W	0.9284	0.8944
P value	0.0029	0.0002
Passed normality test (alpha=0.05)?	No	No
P value summary	**	***
Kolmogorov-Smirnov test
KS distance	0.1736	0.2272
P value	0.0003	<0,0001
Passed normality test (alpha=0.05)?	No	No
P value summary	***	****
Number of values	55	55

## Sheet: Mann-Whitney
Column B	pUbi
vs.	vs,
Column A	pCENH3
Mann Whitney test
P value	0.0006
Exact or approximate P value?	Exact
P value summary	***
Significantly different (P < 0.05)?	Yes
One- or two-tailed P value?	Two-tailed
Sum of ranks in column A,B	2497 , 3608
Mann-Whitney U	957
Difference between medians
Median of column A	14,00, n=55
Median of column B	15,00, n=55
Difference: Actual	1
Difference: Hodges-Lehmann	1
