# Supplementary material for: Competence for transcellular infection in the root cortex involves a post-replicative, cell-cycle exit decision in Medicago truncatula
Source: eLife. 2025 Jul 4;12:RP88588. doi: 10.7554/eLife.88588 (PMC12227204; doi:10.7554/eLife.88588)
Supplement: Figure 6—source data 2. [file elife-88588-fig6-data2.xlsx]

## Sheet: Values
Figure 6 – source data 2
Number of CENH3 signals (early nodule primordia).
C1	C2	C3	C4	C5	E	P			: undivided
14	12	20	14	12	13	16			: divided
13	14	14	12	27	15	12			: infected
12	12	12	30	27	14	13			: non-infected
8	16	12	32	29	13	13
11	12	12	27	28	13	13
15	13	14	22	28	12	13
12	11	26	25	27	14	13
12	12	24	28	26	16	14
10	10	28	23	27	14	15
10	13	24	26	31	15	16
12	13	26	27	23		14
13	12	23	26	24		16
	15	28	29	25		14
	12	24	26	25		16
	26	26	31	27		15
	26	20	27	24		16
	28	25	29	23		14
	27	26	28	29		14
	24	30	28	25		14
	20	21	27	28		12
	24	24	25	27		15
	19	28	26			13
		20	26			15
		25	25			14
			23			15
			22
			25
			22
			21
			27
			26
			29
			28
			28
			24
			25
			25
