# Supplementary material for: Competence for transcellular infection in the root cortex involves a post-replicative, cell-cycle exit decision in Medicago truncatula
Source: eLife. 2025 Jul 4;12:RP88588. doi: 10.7554/eLife.88588 (PMC12227204; doi:10.7554/eLife.88588)
Supplement: Figure 7—figure supplement 1—source data 1. [file elife-88588-fig7-figsupp1-data1.xlsx]

## Sheet: Values
Figure 7 – figure supplement 1 – source data 1
Nuclear area and statistical analyses.
	G2early			G2late
plant 1	57.771		plant 1	74.616
plant 1	65.892		plant 1	62.453
plant 1	63.235		plant 1	57.357
plant 1	65.845		plant 1	86.416
plant 2	66.557		plant 3	45.39
plant 2	60.615		plant 3	61.535
plant 3	66.918		plant 3	48.793
plant 3	79.031		plant 4	65.932
plant 3	54.687		plant 7	80.833
plant 3	53.948		plant 7	79.752
plant 3	60.584		plant 7	77.446
plant 3	57.617		plant 7	65.755
plant 3	64.575		plant 7	87.363
plant 3	69.398		plant 8	45.15
plant 4	73.469		plant 8	45.759
plant 4	69.085		plant 8	57.152
plant 4	76.323		plant 10	70.494
plant 4	64.974
plant 5	69.182
plant 6	49.846
plant 7	74.053
plant 7	79.286
plant 7	79.532
plant 8	44.806
plant 9	58.308

## Sheet: Descriptive statistics
	G2early	G2late
Number of values	25	17
Minimum	44.81	45.15
25% Percentile	58.04	52.97
Median	65.85	65.76
75% Percentile	71.43	78.6
Maximum	79.53	87.36
Range	34.73	42.21
Mean	65.02	65.42
Std. Deviation	9.162	14.26
Std. Error of Mean	1.832	3.458
Lower 95% CI of mean	61.24	58.09
Upper 95% CI of mean	68.8	72.75

## Sheet: Normality
	G2early	G2late
Test for normal distribution
Shapiro-Wilk test
W	0.9741	0.938
P value	0.7483	0.2955
Passed normality test (alpha=0.05)?	Yes	Yes
P value summary	ns	ns
Kolmogorov-Smirnov test
KS distance	0.08057	0.1136
P value	>0,1000	>0,1000
Passed normality test (alpha=0.05)?	Yes	Yes
P value summary	ns	ns
Number of values	25	17

## Sheet: Unpaired t test
Column B	G2late
vs.	vs,
Column A	G2early
Unpaired t test with Welch's correction
P value	0.919
P value summary	ns
Significantly different (P < 0.05)?	No
One- or two-tailed P value?	Two-tailed
Welch-corrected t, df	t=0,1027, df=24,94
How big is the difference?
Mean of column A	65.02
Mean of column B	65.42
Difference between means (B - A) ± SEM	0,4018 ± 3,914
95% confidence interval	-7,660 to 8,463
R squared (eta squared)	0.0004225
F test to compare variances
F, DFn, Dfd	2,422, 16, 24
P value	0.0488
P value summary	*
Significantly different (P < 0.05)?	Yes
Data analyzed
Sample size, column A	25
Sample size, column B	17
