# Supplementary material for: Competence for transcellular infection in the root cortex involves a post-replicative, cell-cycle exit decision in Medicago truncatula
Source: eLife. 2025 Jul 4;12:RP88588. doi: 10.7554/eLife.88588 (PMC12227204; doi:10.7554/eLife.88588)
Supplement: Figure 7—figure supplement 1—source data 2. [file elife-88588-fig7-figsupp1-data2.xlsx]

## Sheet: Values
Figure 7 – figure supplement 1 – source data 2
CENH3 doublet length and statistical analyses.
G2early				G2late
plant 1	nucleus 1	1.62		plant 1	nucleus 1	1.57
plant 1	nucleus 2	1.67		plant 1	nucleus 1	1.5
plant 1	nucleus 2	1.76		plant 1	nucleus 1	1.77
plant 1	nucleus 3	1.59		plant 1	nucleus 1	1.89
plant 1	nucleus 4	1.8		plant 1	nucleus 1	1.69
plant 1	nucleus 5	1.71		plant 1	nucleus 1	1.61
plant 2	nucleus 6	1.37		plant 1	nucleus 2	1.58
plant 2	nucleus 7	1.43		plant 1	nucleus 3	1.51
plant 2	nucleus 8	1.35		plant 1	nucleus 4	1.47
plant 3	nucleus 8	1.81		plant 1	nucleus 5	1.43
plant 3	nucleus 9	1.19		plant 1	nucleus 6	1.56
plant 3	nucleus 10	1.21		plant 1	nucleus 7	1.47
plant 3	nucleus 11	1.18		plant 1	nucleus 3	1.34
plant 3	nucleus 12	1.32		plant 1	nucleus 3	1.38
plant 3	nucleus 13	1.36		plant 1	nucleus 3	1.43
plant 3	nucleus 14	1.71		plant 1	nucleus 3	1.39
plant 3	nucleus 14	1.51		plant 1	nucleus 3	1.71
plant 3	nucleus 15	1.62		plant 1	nucleus 3	1.21
plant 3	nucleus 15	1.52		plant 2	nucleus 4	1.46
plant 3	nucleus 16	1.71		plant 2	nucleus 4	1.41
plant 4	nucleus 16	1.34		plant 2	nucleus 4	1.7
plant 4	nucleus 17	1.22		plant 2	nucleus 4	1.67
plant 4	nucleus 18	1.63		plant 2	nucleus 4	1.52
plant 4	nucleus 18	1.63		plant 2	nucleus 4	1.57
plant 4	nucleus 19	1.42		plant 3	nucleus 5	1.5
plant 4	nucleus 19	1.44		plant 3	nucleus 5	1.32
plant 4	nucleus 20	1.81		plant 3	nucleus 5	1.41
plant 5	nucleus 21	1.5		plant 3	nucleus 5	1.45
plant 6	nucleus 22	1.62		plant 3	nucleus 5	1.58
plant 7	nucleus 23	1.51		plant 3	nucleus 5	1.5
plant 7	nucleus 24	1.25		plant 3	nucleus 6	1.46
plant 7	nucleus 24	1.2		plant 3	nucleus 6	1.22
plant 7	nucleus 24	1.39		plant 3	nucleus 6	1.29
plant 8	nucleus 25	1.17		plant 3	nucleus 6	1.32
plant 9	nucleus 25	1.39		plant 3	nucleus 6	1.32
plant 9	nucleus 25	1.58		plant 3	nucleus 6	1.45
plant 9	nucleus 25	1.57		plant 3	nucleus 7	1.26
plant 9	nucleus 25	1.73		plant 3	nucleus 7	1.44
				plant 3	nucleus 7	1.52
				plant 3	nucleus 7	1.47
				plant 3	nucleus 7	1.36
				plant 3	nucleus 7	1.59
				plant 4	nucleus 8	1.31
				plant 4	nucleus 8	1.56
				plant 4	nucleus 8	1.36
				plant 4	nucleus 8	1.58
				plant 4	nucleus 8	1.25
				plant 4	nucleus 8	1.53
				plant 7	nucleus 9	1.56
				plant 7	nucleus 9	1.43
				plant 7	nucleus 9	1.47
				plant 7	nucleus 9	1.57
				plant 7	nucleus 9	1.34
				plant 7	nucleus 9	1.5
				plant 10	nucleus 10	1.33
				plant 10	nucleus 10	1.78
				plant 10	nucleus 10	1.69
				plant 10	nucleus 10	1.42
				plant 10	nucleus 10	1.62
				plant 10	nucleus 10	1.49

## Sheet: Descriptive statistics
	G2early	G2late
Number of values	38	60
Minimum	1.17	1.21
25% Percentile	1.348	1.383
Median	1.51	1.47
75% Percentile	1.64	1.57
Maximum	1.81	1.89
Range	0.64	0.68
Mean	1.496	1.485
Std. Deviation	0.1972	0.1435
Std. Error of Mean	0.03199	0.01852
Lower 95% CI of mean	1.431	1.448
Upper 95% CI of mean	1.561	1.522

## Sheet: Normality
	G2early	G2late
Test for normal distribution
Shapiro-Wilk test
W	0.9487	0.9833
P value	0.0808	0.5824
Passed normality test (alpha=0.05)?	Yes	Yes
P value summary	ns	ns
Kolmogorov-Smirnov test
KS distance	0.104	0.07023
P value	>0,1000	>0,1000
Passed normality test (alpha=0.05)?	Yes	Yes
P value summary	ns	ns
Number of values	38	60

## Sheet: Unpaired t test
Column B	G2late
vs.	vs,
Column A	G2early
Unpaired t test with Welch's correction
P value	0.7679
P value summary	ns
Significantly different (P < 0.05)?	No
One- or two-tailed P value?	Two-tailed
Welch-corrected t, df	t=0,2964, df=61,63
How big is the difference?
Mean of column A	1.496
Mean of column B	1.485
Difference between means (B - A) ± SEM	-0,01096 ± 0,03696
95% confidence interval	-0,08486 to 0,06294
R squared (eta squared)	0.001424
F test to compare variances
F, DFn, Dfd	1,889, 37, 59
P value	0.0285
P value summary	*
Significantly different (P < 0.05)?	Yes
Data analyzed
Sample size, column A	38
Sample size, column B	60
