# Supplementary material for: Competence for transcellular infection in the root cortex involves a post-replicative, cell-cycle exit decision in Medicago truncatula
Source: eLife. 2025 Jul 4;12:RP88588. doi: 10.7554/eLife.88588 (PMC12227204; doi:10.7554/eLife.88588)
Supplement: Figure 7—source data 1. [file elife-88588-fig7-data1.xlsx]

## Sheet: Values
	Figure 7 – source data 1
	Nuclear area and statistical analysis.
		G2late			C3	* : Data presented in Figure 2C				C4	* : Data presented in Figure 2C				C4/5
	plant 1	183.822		plant 1	250.636	*	a		plant 1	157.615	*	a		plant 1	190.518
	plant 1	128.027		plant 2	206.399	*	a		plant 1	156.502	*	a		plant 1	239.652
	plant 1	146.195		plant 3	171.824	*	a		plant 2	190.728	*	a		plant 1	172.833
	plant 1	202.823		plant 3	179.273	*	a		plant 2	143.096	*	a		plant 1	241.999
	plant 1	174.688		plant 4	191.204	*	a		plant 3	182.42	*	a		plant 1	164.446
	plant 1	133.065		plant 4	101.611	*	a		plant 3	134.805	*	a		plant 1	199.5
	plant 2	242.795		plant 4	106.23	*	a		plant 3	164.111	*	a		plant 1	139.695
	plant 3	153.064		plant 5	266.188	*	a		plant 4	164.893	*	a		plant 1	156.892
	plant 4	127.156		plant 6	173.96	*	a		plant 5	165.555	*	a		plant 1	127.503
	plant 5	97.324		plant 7	131.774	*	a		plant 6	126.642		b		plant 1	238.617
	plant 6	102.443		plant 8	166.956	*	a		plant 6	170.558		b		plant 2	174.692
	plant 6	100.959		plant 8	137.004	*	a		plant 6	194.811		b		plant 2	148.351
	plant 6	135.604		plant 9	175.683	*	a		plant 6	150.388		b		plant 2	132.705
	plant 6	95.72		plant 10	125.834		b		plant 6	135.987		b		plant 2	121.764
	plant 6	100.362		plant 11	104.171		b		plant 7	169.634		b		plant 2	122.896
	plant 6	97.594		plant 12	161.634		b		plant 8	146.413		b		plant 3	104.442
	plant 6	129.401		plant 12	134.803		b		plant 9	216.989		b		plant 3	186.746
	plant 7	196.578		plant 13	207.359		b							plant 4	168.021
	plant 7	125.773		plant 14	134.953		b							plant 4	126.536
	plant 7	113.89		plant 15	134.377		b							plant 4	111.989
	plant 8	169.583		plant 15	144.92		b							plant 5	130.006
	plant 8	170.483		plant 15	136.279		b							plant 5	126.068
	plant 9	257.929		plant 15	187.434		b							plant 5	144.466
	plant 10	102.3		plant 15	163.529		b							plant 5	106.067
	plant 10	142.931		plant 15	146.266		b							plant 5	108.322
	plant 10	178.472		plant 16	186.031		b							plant 5	171.783
	plant 10	128.666												plant 5	159.886
														plant 5	183.017
														plant 5	135.173
														plant 6	182.489
	a: H3.3 together with H3.1													plant 6	140.813
	b: H3.3 together with CENH3													plant 6	178.099
														plant 6	203.826
														plant 6	189.742
														plant 6	173.185
														plant 6	158.355
														plant 6	156.604
														plant 6	124.48
														plant 6	163.73
														plant 6	127.433
														plant 7	221.26
														plant 8	255.285
														plant 8	185.816
														plant 8	233.078
														plant 9	133.356

## Sheet: Descriptive statistics
	G2late	C3	C4	C4/5
Number of values	27	26	17	45
Minimum	95.72	101.6	126.6	104.4
25% Percentile	102.4	134.7	144.8	128.8
Median	133.1	162.6	164.1	159.9
75% Percentile	174.7	186.4	176.5	186.3
Maximum	257.9	266.2	217	255.3
Range	162.2	164.6	90.35	150.8
Mean	145.8	162.6	163	163.6
Std. Deviation	44	40.96	23.63	39.68
Std. Error of Mean	8.468	8.033	5.731	5.915
Lower 95% CI of mean	128.4	146	150.9	151.7
Upper 95% CI of mean	163.2	179.1	175.2	175.5

## Sheet: Normality
	G2late	C3	C4	C4/5
Test for normal distribution
Shapiro-Wilk test
W	0.903	0.9422	0.9675	0.9461
P value	0.0157	0.1515	0.7726	0.0361
Passed normality test (alpha=0.05)?	No	Yes	Yes	No
P value summary	*	ns	ns	*
Kolmogorov-Smirnov test
KS distance	0.1475	0.1182	0.1394	0.09648
P value	>0,1000	>0,1000	>0,1000	>0,1000
Passed normality test (alpha=0.05)?	Yes	Yes	Yes	Yes
P value summary	ns	ns	ns	ns
Number of values	27	26	17	45

## Sheet: Kruskal-Wallis
Number of families	1
Number of comparisons per family	6
Alpha	0.05
Dunn's multiple comparisons test	Mean rank diff,	Significant?	Summary	Adjusted P Value
G2late vs. C3	-16.54	No	ns	0.4258
G2late vs. C4	-19.59	No	ns	0.346
G2late vs. C4/5	-15.98	No	ns	0.294
C3 vs. C4	-3.052	No	ns	>0,9999
C3 vs. C4/5	0.565	No	ns	>0,9999
C4 vs. C4/5	3.617	No	ns	>0,9999
Test details	Mean rank 1	Mean rank 2	Mean rank diff,	n1	n2	Z
G2late vs. C3	45.11	61.65	-16.54	27	26	1.806
G2late vs. C4	45.11	64.71	-19.59	27	17	1.898
G2late vs. C4/5	45.11	61.09	-15.98	27	45	1.969
C3 vs. C4	61.65	64.71	-3.052	26	17	0.2935
C3 vs. C4/5	61.65	61.09	0.565	26	45	0.06878
C4 vs. C4/5	64.71	61.09	3.617	17	45	0.3811
Kruskal-Wallis test
P value	0.1434
Exact or approximate P value?	Approximate
P value summary	ns
Do the medians vary signif. (P < 0.05)?	No
Number of groups	4
Kruskal-Wallis statistic	5.421
Data summary
Number of treatments (columns)	4
Number of values (total)	115
Compact letter display
C4/5	A
C4	A
C3	A
G2late	A
