# Supplementary material for: Competence for transcellular infection in the root cortex involves a post-replicative, cell-cycle exit decision in Medicago truncatula
Source: eLife. 2025 Jul 4;12:RP88588. doi: 10.7554/eLife.88588 (PMC12227204; doi:10.7554/eLife.88588)
Supplement: Figure 7—source data 2. [file elife-88588-fig7-data2.xlsx]

## Sheet: Values
Figure 7 – source data 2
CENH3 doublet length and statistical analysis.
G2early				G2late				IC C4/5
plant 1	nucleus 1	1.354		plant 1	nucleus 1	1.74		plant 1	nucleus 1	1.9
plant 1	nucleus 1	1.621		plant 1	nucleus 1	1.51		plant 1	nucleus 2	1.88
plant 1	nucleus 1	1.569		plant 1	nucleus 1	1.94		plant 1	nucleus 3	1.55
plant 1	nucleus 1	1.669		plant 1	nucleus 1	1.79		plant 1	nucleus 4	1.51
plant 1	nucleus 1	1.448		plant 1	nucleus 1	1.58		plant 1	nucleus 4	1.67
plant 2	nucleus 2	1.65		plant 1	nucleus 1	1.48		plant 2	nucleus 5	1.43
plant 2	nucleus 2	1.84		plant 1	nucleus 2	1.98		plant 2	nucleus 5	1.59
plant 2	nucleus 3	1.81		plant 1	nucleus 2	1.82		plant 2	nucleus 5	1.65
plant 2	nucleus 4	1.67		plant 1	nucleus 2	1.72		plant 3	nucleus 6	1.64
plant 2	nucleus 4	1.43		plant 1	nucleus 2	1.73		plant 3	nucleus 6	1.33
plant 2	nucleus 5	1.71		plant 1	nucleus 2	1.39		plant 3	nucleus 6	1.49
plant 2	nucleus 5	1.98		plant 1	nucleus 2	1.65		plant 4	nucleus 7	1.99
plant 2	nucleus 6	1.592		plant 1	nucleus 3	1.46		plant 4	nucleus 8	1.65
plant 2	nucleus 6	1.651		plant 1	nucleus 3	1.72		plant 4	nucleus 9	1.82
plant 3	nucleus 7	1.97		plant 1	nucleus 3	1.79		plant 5	nucleus 10	1.897
plant 3	nucleus 7	1.87		plant 1	nucleus 3	1.84		plant 5	nucleus 10	2.093
plant 4	nucleus 8	1.87		plant 1	nucleus 3	1.65		plant 5	nucleus 11	1.91
plant 4	nucleus 9	1.754		plant 1	nucleus 3	1.46		plant 5	nucleus 11	1.46
plant 4	nucleus 10	1.848		plant 1	nucleus 4	1.72		plant 5	nucleus 11	1.51
plant 4	nucleus 10	1.843		plant 1	nucleus 4	1.8		plant 5	nucleus 12	1.78
plant 4	nucleus 11	1.909		plant 1	nucleus 4	1.46		plant 6	nucleus 13	1.8
plant 4	nucleus 11	1.753		plant 1	nucleus 4	1.86
plant 4	nucleus 11	1.939		plant 1	nucleus 4	1.67
plant 4	nucleus 11	1.676		plant 1	nucleus 4	1.41
plant 4	nucleus 11	1.945		plant 1	nucleus 5	1.85
plant 5	nucleus 12	1.903		plant 1	nucleus 5	1.75
plant 5	nucleus 12	1.659		plant 1	nucleus 5	1.68
plant 5	nucleus 12	1.732		plant 1	nucleus 5	1.7
				plant 1	nucleus 5	1.84
				plant 1	nucleus 5	2.16
				plant 1	nucleus 6	1.51
				plant 1	nucleus 6	1.67
				plant 1	nucleus 6	1.35
				plant 1	nucleus 6	1.65
				plant 1	nucleus 6	1.48
				plant 1	nucleus 6	1.53
				plant 1	nucleus 7	1.76
				plant 1	nucleus 7	1.44
				plant 1	nucleus 7	1.84
				plant 1	nucleus 7	1.84
				plant 1	nucleus 7	1.24
				plant 1	nucleus 7	1.47
				plant 2	nucleus 8	2
				plant 2	nucleus 8	1.99
				plant 2	nucleus 8	1.84
				plant 2	nucleus 8	1.53
				plant 2	nucleus 8	1.83
				plant 2	nucleus 8	1.92
				plant 3	nucleus 9	1.87
				plant 3	nucleus 9	1.94
				plant 3	nucleus 9	1.7
				plant 3	nucleus 9	1.65
				plant 3	nucleus 9	1.4
				plant 3	nucleus 9	1.65
				plant 4	nucleus 10	1.87
				plant 4	nucleus 10	1.49
				plant 4	nucleus 10	1.45
				plant 4	nucleus 10	1.42
				plant 4	nucleus 10	1.45
				plant 4	nucleus 10	1.57
				plant 5	nucleus 11	1.52
				plant 5	nucleus 11	1.6
				plant 5	nucleus 11	1.78
				plant 5	nucleus 11	1.73
				plant 5	nucleus 11	1.69
				plant 5	nucleus 11	1.44
				plant 6	nucleus 12	2.09
				plant 6	nucleus 12	1.77
				plant 6	nucleus 12	2.11
				plant 6	nucleus 12	1.83
				plant 6	nucleus 12	1.9
				plant 6	nucleus 12	1.86
				plant 6	nucleus 13	1.68
				plant 6	nucleus 13	1.8
				plant 6	nucleus 13	1.68
				plant 6	nucleus 13	1.76
				plant 6	nucleus 13	1.42
				plant 6	nucleus 13	1.74
				plant 6	nucleus 14	1.79
				plant 6	nucleus 14	1.84
				plant 6	nucleus 14	1.84
				plant 6	nucleus 14	1.45
				plant 6	nucleus 14	1.68
				plant 6	nucleus 14	1.67
				plant 6	nucleus 15	1.79
				plant 6	nucleus 15	1.69
				plant 6	nucleus 15	1.58
				plant 6	nucleus 15	1.68
				plant 6	nucleus 15	1.4
				plant 6	nucleus 15	1.65
				plant 7	nucleus 16	1.66
				plant 7	nucleus 16	1.55
				plant 7	nucleus 16	1.73
				plant 7	nucleus 16	1.82

## Sheet: Descriptive statistics
	G2early	G2late	IC C4/5
Number of values	28	94	21
Minimum	1.35	1.24	1.33
25% Percentile	1.65	1.528	1.51
Median	1.74	1.695	1.65
75% Percentile	1.87	1.83	1.89
Maximum	1.98	2.16	2.09
Range	0.63	0.92	0.76
Mean	1.738	1.689	1.693
Std. Deviation	0.1672	0.1852	0.2062
Std. Error of Mean	0.0316	0.0191	0.04499
Lower 95% CI of mean	1.673	1.651	1.599
Upper 95% CI of mean	1.803	1.726	1.787

## Sheet: Normality
	G2early	G2late	IC C4/5
Test for normal distribution
Shapiro-Wilk test
W	0.954	0.9806	0.9685
P value	0.2497	0.1778	0.6986
Passed normality test (alpha=0.05)?	Yes	Yes	Yes
P value summary	ns	ns	ns
Kolmogorov-Smirnov test
KS distance	0.1222	0.09849	0.1156
P value	>0,1000	0.0251	>0,1000
Passed normality test (alpha=0.05)?	Yes	No	Yes
P value summary	ns	*	ns
Number of values	28	94	21

## Sheet: Kruskal-Wallis
Number of families	1
Number of comparisons per family	3
Alpha	0.05
Dunn's multiple comparisons test	Mean rank diff,	Significant?	Summary	Adjusted P Value
G2early vs. G2late	11.72	No	ns	0.5655
G2early vs. IC C4/5	11.49	No	ns	>0,9999
G2late vs. IC C4/5	-0.2345	No	ns	>0,9999
Test details	Mean rank 1	Mean rank 2	Mean rank diff,	n1	n2	Z
G2early vs. G2late	81.39	69.67	11.72	28	94	1.315
G2early vs. IC C4/5	81.39	69.9	11.49	28	21	0.9611
G2late vs. IC C4/5	69.67	69.9	-0.2345	94	21	0.02347
Kruskal-Wallis test
P value	0.4081
Exact or approximate P value?	Approximate
P value summary	ns
Do the medians vary signif. (P < 0.05)?	No
Number of groups	3
Kruskal-Wallis statistic	1.792
Data summary
Number of treatments (columns)	3
Number of values (total)	143
Compact letter display
G2early	A
IC C4/5	A
G2late	A
