# Supplementary material for: Competence for transcellular infection in the root cortex involves a post-replicative, cell-cycle exit decision in Medicago truncatula
Source: eLife. 2025 Jul 4;12:RP88588. doi: 10.7554/eLife.88588 (PMC12227204; doi:10.7554/eLife.88588)
Supplement: Figure 8—figure supplement 1—source data 3. [file elife-88588-fig8-figsupp1-data3.xlsx]

## Sheet: Values
Figure 8 – figure supplement 1 – source data 3
Percentages of KNOLLE-positive cells and statistical analysis.
	[-] NF-YA1			[+] NF-YA1
leaf sample 1	85.49		leaf sample 1	68.49
leaf sample 2	88.69		leaf sample 2	79.92
leaf sample 3	80.42		leaf sample 3	64.89
leaf sample 4	68.28		leaf sample 4	79.31
leaf sample 5	68.33		leaf sample 5	33.9
leaf sample 6	82.11		leaf sample 6	43.7
leaf sample 7	80.67		leaf sample 7	63.86
leaf sample 8	70.86		leaf sample 8	73.97
leaf sample 9	82.76		leaf sample 9	33.55
leaf sample 10	80.28		leaf sample 10	39.67
leaf sample 11	67.97		leaf sample 11	61.63
leaf sample 12	66.8		leaf sample 12	62.96
leaf sample 13	77.83		leaf sample 13	75.52

## Sheet: Descriptive statistics
	[-] NF-YA1	[+] NF-YA1
Number of values	13	13
Minimum	66.8	33.55
25% Percentile	68.31	41.69
Median	80.28	63.86
75% Percentile	82.44	74.75
Maximum	88.69	79.92
Range	21.89	46.37
Mean	76.96	60.11
Std. Deviation	7.523	16.8
Std. Error of Mean	2.086	4.66
Lower 95% CI of mean	72.41	49.95
Upper 95% CI of mean	81.51	70.26

## Sheet: Normality
	[-] NF-YA1	[+] NF-YA1
Test for normal distribution
Shapiro-Wilk test
W	0.8925	0.8806
P value	0.1056	0.0726
Passed normality test (alpha=0.05)?	Yes	Yes
P value summary	ns	ns
Kolmogorov-Smirnov test
KS distance	0.2089	0.2285
P value	>0,1000	0.0621
Passed normality test (alpha=0.05)?	Yes	Yes
P value summary	ns	ns
Number of values	13	13

## Sheet: Unpaired t test
Column B	[+] NF-YA1
vs.	vs,
Column A	[-] NF-YA1
Unpaired t test with Welch's correction
P value	0.0043
P value summary	**
Significantly different (P < 0.05)?	Yes
One- or two-tailed P value?	Two-tailed
Welch-corrected t, df	t=3,301, df=16,63
How big is the difference?
Mean of column A	76.96
Mean of column B	60.11
Difference between means (B - A) ± SEM	-16,86 ± 5,106
95% confidence interval	-27,65 to -6,065
R squared (eta squared)	0.396
F test to compare variances
F, DFn, Dfd	4,988, 12, 12
P value	0.0093
P value summary	**
Significantly different (P < 0.05)?	Yes
Data analyzed
Sample size, column A	13
Sample size, column B	13
