# Supplementary material for: Competence for transcellular infection in the root cortex involves a post-replicative, cell-cycle exit decision in Medicago truncatula
Source: eLife. 2025 Jul 4;12:RP88588. doi: 10.7554/eLife.88588 (PMC12227204; doi:10.7554/eLife.88588)
Supplement: Figure 8—figure supplement 1—source data 4. [file elife-88588-fig8-figsupp1-data4.xlsx]

## Sheet: Values
Figure 8 – figure supplement 1 – source data 4
Percentages of split cells and statistical analysis.
	[-] NF-YA1			[+] NF-YA1
leaf sample 1	100		leaf sample 1	95.04
leaf sample 2	99.06		leaf sample 2	97.47
leaf sample 3	100		leaf sample 3	88.24
leaf sample 4	99.15		leaf sample 4	87.18
leaf sample 5	97.48		leaf sample 5	96.67
leaf sample 6	98.02		leaf sample 6	96.97
leaf sample 7	97.96		leaf sample 7	91.76
leaf sample 8	98.57		leaf sample 8	98.82
leaf sample 9	98.97		leaf sample 9	91.53
leaf sample 10	96.43		leaf sample 10	97.38
leaf sample 11	100
leaf sample 12	97.22

## Sheet: Descriptive statistics
	[-] NF-YA1	[+] NF-YA1
Number of values	12	10
Minimum	96.43	87.18
25% Percentile	97.6	90.71
Median	98.77	95.86
75% Percentile	99.79	97.4
Maximum	100	98.82
Range	3.57	11.64
Mean	98.57	94.11
Std. Deviation	1.173	4.142
Std. Error of Mean	0.3386	1.31
Lower 95% CI of mean	97.83	91.14
Upper 95% CI of mean	99.32	97.07

## Sheet: Normality
	[-] NF-YA1	[+] NF-YA1
Test for normal distribution
Shapiro-Wilk test
W	0.9376	0.8824
P value	0.4682	0.1391
Passed normality test (alpha=0.05)?	Yes	Yes
P value summary	ns	ns
Kolmogorov-Smirnov test
KS distance	0.1383	0.232
P value	>0,1000	>0,1000
Passed normality test (alpha=0.05)?	Yes	Yes
P value summary	ns	ns
Number of values	12	10

## Sheet: Unpaired t test
Column B	[+] NF-YA1
vs.	vs,
Column A	[-] NF-YA1
Unpaired t test with Welch's correction
P value	0.0078
P value summary	**
Significantly different (P < 0.05)?	Yes
One- or two-tailed P value?	Two-tailed
Welch-corrected t, df	t=3,301, df=10,21
How big is the difference?
Mean of column A	98.57
Mean of column B	94.11
Difference between means (B - A) ± SEM	-4,466 ± 1,353
95% confidence interval	-7,472 to -1,459
R squared (eta squared)	0.5163
F test to compare variances
F, DFn, Dfd	12,47, 9, 11
P value	0.0003
P value summary	***
Significantly different (P < 0.05)?	Yes
Data analyzed
Sample size, column A	12
Sample size, column B	10
