# Supplementary material for: Competence for transcellular infection in the root cortex involves a post-replicative, cell-cycle exit decision in Medicago truncatula
Source: eLife. 2025 Jul 4;12:RP88588. doi: 10.7554/eLife.88588 (PMC12227204; doi:10.7554/eLife.88588)
Supplement: Figure 8—figure supplement 2—source data 1. [file elife-88588-fig8-figsupp2-data1.xlsx]

## Sheet: Values
Figure 8 – figure supplement 2 – source data 1
GUS activity and statistical analysis.
	[-] TF			[+] MYB3RR			[+] NF-YA1
leaf 1	25.3867		leaf 1	29.0347		leaf 1	18.6818
leaf 2	20.5796		leaf 2	29.7013		leaf 2	18.2493
leaf 3	85.1947		leaf 3	29.4107		leaf 3	22.88
leaf 4	95.8836		leaf 4	8.58444		leaf 4	25.4747
leaf 5	55.6578		leaf 5	14.8236		leaf 5	8.84385
leaf 6	32.1849		leaf 6	3.57022		leaf 6	4.15941
leaf 7	43.7627		leaf 7	4.77289		leaf 7	12.0261
leaf 8	26.0004		leaf 8	42.1969		leaf 8	24.8796
leaf 9	23.4031		leaf 9	55.0342		leaf 9	12.1942
leaf 10	50.6502		leaf 10	32.5222		leaf 10	2.69289
leaf 11	61.348		leaf 11	55.5942		leaf 11	3.93644
leaf 12	51.004		leaf 12	70.2262		leaf 12	37.7498
leaf 13	98.9		leaf 13	71.4707		leaf 13	18.4804
leaf 14	108.853		leaf 14	56.3151		leaf 14	51.1302
leaf 15	68.5151		leaf 15	52.3009		leaf 15	2.88456
leaf 16	62.0129					leaf 16	7.49589
leaf 17	84.46
leaf 18	116.054

## Sheet: Descriptive statistics
	[-] TF	[+] MYB3RR	[+] NF-YA1
Number of values	18	15	16
Minimum	20.58	3.57	2.693
25% Percentile	30.64	14.82	4.994
Median	58.5	32.52	15.22
75% Percentile	87.87	55.59	24.38
Maximum	116.1	71.47	51.13
Range	95.47	67.9	48.44
Mean	61.66	37.04	16.98
Std. Deviation	30.74	22.75	13.45
Std. Error of Mean	7.245	5.875	3.363
Lower 95% CI of mean	46.37	24.44	9.816
Upper 95% CI of mean	76.94	49.64	24.15

## Sheet: Normality
	[-] TF	[+] MYB3RR	[+] NF-YA1
Test for normal distribution
Shapiro-Wilk test
W	0.9386	0.9336	0.8891
P value	0.2739	0.3082	0.054
Passed normality test (alpha=0.05)?	Yes	Yes	Yes
P value summary	ns	ns	ns
Kolmogorov-Smirnov test
KS distance	0.109	0.1488	0.144
P value	>0,1000	>0,1000	>0,1000
Passed normality test (alpha=0.05)?	Yes	Yes	Yes
P value summary	ns	ns	ns
Number of values	18	15	16

## Sheet: Brown-Forsythe
Number of families	1
Number of comparisons per family	2
Alpha	0.05
Dunnett's T3 multiple comparisons test	Mean Diff,	95,00% CI of diff,	Below threshold?	Summary	Adjusted P Value
[-] TF vs. [+] MYB3RR	24.62	2,734 to 46,51	Yes	*	0.0254
[-] TF vs. [+] NF-YA1	44.67	25,66 to 63,69	Yes	****	<0,0001
Test details	Mean 1	Mean 2	Mean Diff,	SE of diff,	n1	n2	t	DF
[-] TF vs. [+] MYB3RR	61.66	37.04	24.62	9.328	18	15	2.64	30.63
[-] TF vs. [+] NF-YA1	61.66	16.98	44.67	7.988	18	16	5.593	23.86
Brown-Forsythe ANOVA test
F* (DFn, DFd)	15,79 (2,000, 37,27)
P value	<0,0001
P value summary	****
Significant diff. among means (P < 0.05)?	Yes
Welch's ANOVA test
W (DFn, DFd)	16,91 (2,000, 27,74)
P value	<0,0001
P value summary	****
Significant diff. among means (P < 0.05)?	Yes
Data summary
Number of treatments (columns)	3
Number of values (total)	49
