# Supplementary material for: Competence for transcellular infection in the root cortex involves a post-replicative, cell-cycle exit decision in Medicago truncatula
Source: eLife. 2025 Jul 4;12:RP88588. doi: 10.7554/eLife.88588 (PMC12227204; doi:10.7554/eLife.88588)
Supplement: Figure 8—source data 1. [file elife-88588-fig8-data1.xlsx]

## Sheet: Values
Figure 8 – source data 1
GUS activity (pH4) and statistical analysis.
	[-] NF-YA1			[+] NF-YA1
leaf 1	120.211		leaf 1	108.728
leaf 2	104.851		leaf 2	82.5227
leaf 3	96.7707		leaf 3	59.2116
leaf 4	78.3902		leaf 4	83.0089
leaf 5	88.4933		leaf 5	108.728
leaf 6	64.768		leaf 6	82.5227
leaf 7	63.4658		leaf 7	59.2116
leaf 8	88.5022		leaf 8	83.0089
leaf 9	74.7818		leaf 9	56.0698
leaf 10	98.6911		leaf 10	84.8618
leaf 11	81.1889		leaf 11	75.6138
leaf 12	63.7516		leaf 12	51.2902

## Sheet: Descriptive statistics
	[-] NF-YA1	[+] NF-YA1
Number of values	12	12
Minimum	63.47	51.29
25% Percentile	67.27	59.21
Median	84.84	82.52
75% Percentile	98.21	84.4
Maximum	120.2	108.7
Range	56.74	57.44
Mean	85.32	77.9
Std. Deviation	17.76	18.91
Std. Error of Mean	5.127	5.458
Lower 95% CI of mean	74.04	65.88
Upper 95% CI of mean	96.61	89.91

## Sheet: Normality
	[-] NF-YA1	[+] NF-YA1
Test for normal distribution
Shapiro-Wilk test
W	0.9474	0.8983
P value	0.5994	0.1509
Passed normality test (alpha=0.05)?	Yes	Yes
P value summary	ns	ns
Kolmogorov-Smirnov test
KS distance	0.1264	0.1897
P value	>0,1000	>0,1000
Passed normality test (alpha=0.05)?	Yes	Yes
P value summary	ns	ns
Number of values	12	12

## Sheet: Unpaired t test
Column B	[+] NF-YA1
vs.	vs,
Column A	[-] NF-YA1
Unpaired t test with Welch's correction
P value	0.3323
P value summary	ns
Significantly different (P < 0.05)?	No
One- or two-tailed P value?	Two-tailed
Welch-corrected t, df	t=0,9913, df=21,91
How big is the difference?
Mean of column A	85.32
Mean of column B	77.9
Difference between means (B - A) ± SEM	-7,424 ± 7,489
95% confidence interval	-22,96 to 8,110
R squared (eta squared)	0.04292
F test to compare variances
F, DFn, Dfd	1,133, 11, 11
P value	0.8394
P value summary	ns
Significantly different (P < 0.05)?	No
Data analyzed
Sample size, column A	12
Sample size, column B	12
