# Supplementary material for: Competence for transcellular infection in the root cortex involves a post-replicative, cell-cycle exit decision in Medicago truncatula
Source: eLife. 2025 Jul 4;12:RP88588. doi: 10.7554/eLife.88588 (PMC12227204; doi:10.7554/eLife.88588)
Supplement: Figure 8—source data 2. [file elife-88588-fig8-data2.xlsx]

## Sheet: Values
Figure 8 – source data 2
GUS activity (pKNOLLE) and statistical analysis.
	[-] NF-YA1			[+] NF-YA1			[+] NF-YA1mutDBD
leaf 1	56.5498		leaf 1	15.0982		leaf 1	44.7871
leaf 2	29.0431		leaf 2	14.1516		leaf 2	30.9444
leaf 3	64.4236		leaf 3	17.7427		leaf 3	70.2511
leaf 4	26.0004		leaf 4	19.596		leaf 4	71.476
leaf 5	23.4031		leaf 5	24.8796		leaf 5	19.8938
leaf 6	50.6502		leaf 6	12.1942		leaf 6	23.7036
leaf 7	68.5151		leaf 7	2.69289		leaf 7	3.30089
leaf 8	62.0129		leaf 8	2.88456		leaf 8	18.7836
leaf 9	84.46		leaf 9	7.49589		leaf 9	60.508
leaf 10	116.054		leaf 10	9.62963		leaf 10	44.4084
leaf 11	59.3904		leaf 11	1.72259		leaf 11	49.916
leaf 12	26.5596		leaf 12	4.05148		leaf 12	63.044
leaf 13	31.7974		leaf 13	19.5204		leaf 13	68.1316
leaf 14	25.7937		leaf 14	13.3844		leaf 14	38.9511
leaf 15	104.858		leaf 15	38.9422		leaf 15	100.848
leaf 16	85.2524		leaf 16	44.9413		leaf 16	127.978
leaf 17	75.976
leaf 18	116.358

## Sheet: Descriptive statistics
	[-] NF-YA1	[+] NF-YA1	[+] NF-YA1mutDBD
Number of values	18	16	16
Minimum	23.4	1.723	3.301
25% Percentile	28.42	4.913	25.51
Median	60.7	13.77	47.35
75% Percentile	84.66	19.58	69.72
Maximum	116.4	44.94	128
Range	92.96	43.22	124.7
Mean	61.51	15.56	52.31
Std. Deviation	31.17	12.39	32
Std. Error of Mean	7.346	3.097	8
Lower 95% CI of mean	46.01	8.957	35.26
Upper 95% CI of mean	77	22.16	69.36

## Sheet: Normality
	[-] NF-YA1	[+] NF-YA1	[+] NF-YA1mutDBD
Test for normal distribution
Shapiro-Wilk test
W	0.9133	0.8829	0.9523
P value	0.0984	0.043	0.5265
Passed normality test (alpha=0.05)?	Yes	No	Yes
P value summary	ns	*	ns
Kolmogorov-Smirnov test
KS distance	0.1631	0.1847	0.1496
P value	>0,1000	>0,1000	>0,1000
Passed normality test (alpha=0.05)?	Yes	Yes	Yes
P value summary	ns	ns	ns
Number of values	18	16	16

## Sheet: Kruskal-Wallis
Number of families	1
Number of comparisons per family	2
Alpha	0.05
Dunn's multiple comparisons test	Mean rank diff,	Significant?	Summary	Adjusted P Value
[-] NF-YA1 vs. [+] NF-YA1	23.15	Yes	****	<0,0001
[-] NF-YA1 vs. [+] NF-YA1mutDBD	4.278	No	ns	0.7861
Test details	Mean rank 1	Mean rank 2	Mean rank diff,	n1	n2	Z
[-] NF-YA1 vs. [+] NF-YA1	34.28	11.13	23.15	18	16	4.623
[-] NF-YA1 vs. [+] NF-YA1mutDBD	34.28	30	4.278	18	16	0.8541
Kruskal-Wallis test
P value	<0,0001
Exact or approximate P value?	Approximate
P value summary	****
Do the medians vary signif. (P < 0.05)?	Yes
Number of groups	3
Kruskal-Wallis statistic	23.61
Data summary
Number of treatments (columns)	3
Number of values (total)	50
