# Supplementary material for: Competence for transcellular infection in the root cortex involves a post-replicative, cell-cycle exit decision in Medicago truncatula
Source: eLife. 2025 Jul 4;12:RP88588. doi: 10.7554/eLife.88588 (PMC12227204; doi:10.7554/eLife.88588)
Supplement: Figure 9—figure supplement 2—source data 1. [file elife-88588-fig9-figsupp2-data1.xlsx]

## Sheet: Values
Figure 9 – figure supplement 2 – source data 1
Number of nodule primordia per transformed root and statistical analysis.
Control [EV]			pENOD11::NF-YA1
plant 1	1		plant 1	2
plant 1	2		plant 2	1
plant 2	4		plant 2	1
plant 2	5		plant 3	2
plant 3	3		plant 4	8
plant 3	6		plant 5	5
plant 4	5		plant 6	2
plant 5	6		plant 6	6
plant 5	8		plant 7	4
plant 5	6		plant 7	9
plant 6	4		plant 7	7
plant 6	6		plant 8	2
plant 7	2		plant 8	2
plant 7	3		plant 9	4
plant 7	3		plant 10	10
plant 8	4		plant 10	2
plant 8	9		plant 10	3
plant 8	4		plant 11	5
plant 9	4		plant 11	5
plant 10	10		plant 12	2
plant 11	5		plant 13	3
plant 11	3		plant 14	4
plant 12	4		plant 15	9
plant 13	3		plant 16	2
plant 14	5		plant 16	4
plant 15	5		plant 17	8
plant 15	4		plant 18	3
plant 15	6		plant 18	4
plant 15	5		plant 18	1
plant 15	5		plant 19	4
plant 16	12		plant 20	3
plant 17	7		plant 21	5
plant 18	3		plant 21	2
plant 18	3		plant 22	2
plant 19	2		plant 22	2
plant 19	7		plant 22	5
plant 20	6		plant 23	4
plant 20	1		plant 24	4
plant 20	2		plant 24	1
plant 21	4		plant 24	2
plant 21	7		plant 25	3
plant 22	11		plant 25	3
plant 23	3		plant 25	3
plant 24	3		plant 26	1
plant 24	5		plant 26	3
plant 25	2		plant 27	1
plant 25	2		plant 27	3
plant 26	6		plant 27	3
plant 26	2		plant 27	3
plant 26	2		plant 28	1
plant 26	3		plant 28	4
plant 27	5		plant 29	2
plant 27	14		plant 29	1
plant 27	6		plant 29	1
plant 28	7		plant 30	2
plant 28	5		plant 30	2
plant 29	8		plant 31	2
plant 30	3		plant 31	2
plant 30	4		plant 32	4
plant 31	12		plant 32	5
plant 31	1		plant 32	5
plant 32	12		plant 33	8
plant 32	2
plant 32	4
plant 33	7
plant 33	10
plant 33	1

## Sheet: Descriptive statistics
	Control [EV]	pENOD11::NF-YA1
Number of values	67	62
Minimum	1	1
25% Percentile	3	2
Median	4	3
75% Percentile	6	4.25
Maximum	14	10
Range	13	9
Mean	4.985	3.484
Std. Deviation	2.952	2.208
Std. Error of Mean	0.3606	0.2805
Lower 95% CI of mean	4.265	2.923
Upper 95% CI of mean	5.705	4.045

## Sheet: Normality
	Control [EV]	pENOD11::NF-YA1
Test for normal distribution
Shapiro-Wilk test
W	0.9032	0.8628
P value	<0,0001	<0,0001
Passed normality test (alpha=0.05)?	No	No
P value summary	****	****
Kolmogorov-Smirnov test
KS distance	0.1547	0.1835
P value	0.0004	<0,0001
Passed normality test (alpha=0.05)?	No	No
P value summary	***	****
Number of values	67	62

## Sheet: Mann-Whitney
Column B	pENOD11::NF-YA1
vs.	vs,
Column A	Control [EV]
Mann Whitney test
P value	0.0009
Exact or approximate P value?	Exact
P value summary	***
Significantly different (P < 0.05)?	Yes
One- or two-tailed P value?	Two-tailed
Sum of ranks in column A,B	5047 , 3339
Mann-Whitney U	1386
Difference between medians
Median of column A	4,000, n=67
Median of column B	3,000, n=62
Difference: Actual	-1
Difference: Hodges-Lehmann	-1
