# Supplementary material for: Competence for transcellular infection in the root cortex involves a post-replicative, cell-cycle exit decision in Medicago truncatula
Source: eLife. 2025 Jul 4;12:RP88588. doi: 10.7554/eLife.88588 (PMC12227204; doi:10.7554/eLife.88588)
Supplement: Figure 9—figure supplement 4—source data 1. [file elife-88588-fig9-figsupp4-data1.xlsx]

## Sheet: Values
Figure 9 – figure supplement 4 – source data 1
Nuclear area and statistical analyses.
	Control				pENOD11::NF-YA1
	NC	IC			NC	IC
plant 1	101.541	204.263		plant 1	96.249	139.781
plant 1	97.497	231.398		plant 1	83.688	122.711
plant 1	89.488	187.779		plant 1	120.105	159.084
plant 1	225.551	174.555		plant 2	154.333	169.753
plant 1	149.989	250.078		plant 2	146.11	146.667
plant 2	71.734	91.412		plant 3	142.838	171.514
plant 2	95.223	146.134		plant 3	61.603	101.534
plant 3	89.404	182.414		plant 3	128.988	148.225
plant 3	83.375	183.141		plant 3	187.808	186.833
plant 3	178.566	183.293		plant 3	153.037	244.095
plant 3	185.629	181.391		plant 3	200.145	192.287
plant 3	132.553	144.776		plant 4	71.9	112.386
plant 4	172.904	172.045		plant 4	77.719	105.378
plant 4	100.781	144.151		plant 5	81.55	136.632
plant 4	179.066	244.884		plant 5	92.669	155.254
plant 5	43.964	137.228		plant 5	170.984	201.192
plant 5	73.022	112.598		plant 5	157.299	196.978
plant 6	130.721	164.803		plant 5	191.794	174.964
plant 7	163.061	257.082		plant 5	108.363	114.663
plant 7	102.168	143.979		plant 5	110.682	111.856
plant 7	124.253	234.193		plant 5	119.648	150.12
plant 7	91.447	175.605		plant 5	94.035	64.653
				plant 5	98.297	115.791
				plant 6	135.962	152.625
				plant 6	104.105	185.682
				plant 7	132.524	164.892
				plant 7	100.156	98.521
				plant 8	109.908	207.087
				plant 8	123.074	118.584
				plant 8	193.626	224.922
				plant 8	98.038	150.22
				plant 9	174.753	218.631
				plant 9	179.064	245.973
				plant 9	130.519	267.278
				plant 10	112.692	164.055
				plant 10	117.771	187.916
				plant 10	115.087	121.604
				plant 10	104.119	215.312

## Sheet: Descriptive statistics
	Control		pENOD11::NF-YA1
	NC	IC	NC	IC
Number of values	22	22	38	38
Minimum	43.96	91.41	61.6	64.65
25% Percentile	89.47	144.6	98.23	120.8
Median	101.9	178.5	118.7	157.2
75% Percentile	165.5	211	153.4	193.5
Maximum	225.6	257.1	200.1	267.3
Range	181.6	165.7	138.5	202.6
Mean	121.9	179.4	125.8	161.7
Std. Deviation	46.1	44.1	36.55	46.36
Std. Error of Mean	9.828	9.403	5.929	7.521
Lower 95% CI of mean	101.5	159.9	113.8	146.5
Upper 95% CI of mean	142.3	199	137.8	177

## Sheet: Normality
	Control		pENOD11::NF-YA1
	NC	IC	NC	IC
Test for normal distribution
Shapiro-Wilk test
W	0.9423	0.9575	0.9568	0.9834
P value	0.221	0.4401	0.1487	0.8327
Passed normality test (alpha=0.05)?	Yes	Yes	Yes	Yes
P value summary	ns	ns	ns	ns
Kolmogorov-Smirnov test
KS distance	0.2112	0.1521	0.1148	0.08945
P value	0.0118	>0,1000	>0,1000	>0,1000
Passed normality test (alpha=0.05)?	No	Yes	Yes	Yes
P value summary	*	ns	ns	ns
Number of values	22	22	38	38

## Sheet: Kruskal-Wallis
Number of families	1
Number of comparisons per family	6
Alpha	0.05
Dunn's multiple comparisons test	Mean rank diff,	Significant?	Summary	Adjusted P Value
NC (Control) vs. IC (Control)	-41	Yes	***	0.0006
NC (Control) vs. NC (pENOD11::NF-YA1)	-3.734	No	ns	>0,9999
NC (Control) vs. IC (pENOD11::NF-YA1)	-29.94	Yes	**	0.0079
IC (Control) vs. NC (pENOD11::NF-YA1)	37.27	Yes	***	0.0004
IC (Control) vs. IC (pENOD11::NF-YA1)	11.06	No	ns	>0,9999
NC (pENOD11::NF-YA1) vs. IC (pENOD11::NF-YA1)	-26.21	Yes	**	0.0061
Test details	Mean rank 1	Mean rank 2	Mean rank diff,	n1	n2	Z
NC (Control) vs. IC (Control)	42.32	83.32	-41	22	22	3.909
NC (Control) vs. NC (pENOD11::NF-YA1)	42.32	46.05	-3.734	22	38	0.4007
NC (Control) vs. IC (pENOD11::NF-YA1)	42.32	72.26	-29.94	22	38	3.213
IC (Control) vs. NC (pENOD11::NF-YA1)	83.32	46.05	37.27	22	38	3.999
IC (Control) vs. IC (pENOD11::NF-YA1)	83.32	72.26	11.06	22	38	1.186
NC (pENOD11::NF-YA1) vs. IC (pENOD11::NF-YA1)	46.05	72.26	-26.21	38	38	3.284
Kruskal-Wallis test
P value	<0,0001
Exact or approximate P value?	Approximate
P value summary	****
Do the medians vary signif. (P < 0.05)?	Yes
Number of groups	4
Kruskal-Wallis statistic	26.38
Data summary
Number of treatments (columns)	4
Number of values (total)	120
Compact letter display
IC (Control)	A
IC (pENOD11::NF-YA1)	A
NC (pENOD11::NF-YA1)	B
NC (Control)	B
