# Supplementary material for: Competence for transcellular infection in the root cortex involves a post-replicative, cell-cycle exit decision in Medicago truncatula
Source: eLife. 2025 Jul 4;12:RP88588. doi: 10.7554/eLife.88588 (PMC12227204; doi:10.7554/eLife.88588)
Supplement: Figure 9—figure supplement 4—source data 2. [file elife-88588-fig9-figsupp4-data2.xlsx]

## Sheet: Values
Figure 9 – figure supplement 4 – source data 2
Corrected total pKNOLLE nuclear fluorescence and statistical analyses.
Control							pENOD11::NF-YA1
	IC		NCs		NP			IC		NCs		NP
plant 1	166.05	plant 1	224.856	plant 1	1518.9		plant 1	494.989	plant 1	470.9	plant 2	1292.27
plant 1	431.238	plant 1	181.285	plant 1	1451.55		plant 1	796.864	plant 1	1776.98	plant 2	1230.47
plant 1	307.059	plant 1	258.475	plant 1	2002.5		plant 1	1441.46	plant 1	1021.88	plant 2	959.536
plant 1	820.136	plant 2	147.982	plant 1	1507.01		plant 2	646.914	plant 2	314.86	plant 2	1255.42
plant 2	86.2878	plant 2	651.363	plant 2	2156.75		plant 2	562.901	plant 2	511.159	plant 2	748.725
plant 2	1254.7	plant 2	2900.25	plant 2	2739.17		plant 2	431.042	plant 3	2107.5	plant 3	2163.4
plant 2	1186.13	plant 2	1446.68	plant 2	3215.79		plant 3	1054.23	plant 4	84.2901	plant 4	1064.37
plant 2	1686.28	plant 2	3306.1	plant 2	3226.95		plant 4	23.8545	plant 4	155.002	plant 4	423.365
plant 2	1550.5	plant 2	3992.93	plant 2	4178.78		plant 4	216.926	plant 5	480.743	plant 5	2898.71
plant 2	1705.86	plant 2	3268.76	plant 2	3205.02		plant 5	40.1303	plant 5	110.837	plant 5	2116.83
plant 2	2155.97	plant 3	370.526	plant 2	2205.59		plant 5	34.5276	plant 5	334.862	plant 5	2486.1
plant 3	436.017	plant 3	1649.02	plant 3	2122.33		plant 5	96.621	plant 6	150.575	plant 6	751.323
plant 3	2079.93	plant 3	1368.58	plant 3	5881.74		plant 6	197.513	plant 6	624.192	plant 6	750.939
plant 3	1091.52	plant 3	1197.63	plant 3	2720.04		plant 6	196.081	plant 7	544.766	plant 7	7785.36
plant 3	1529.15	plant 4	5372.06	plant 3	1734.43		plant 7	48.2779	plant 7	333.151	plant 7	5266.84
plant 4	361.846	plant 4	3731.21	plant 4	13172.1		plant 7	207.781	plant 8	54.0946	plant 7	5310.42
plant 4	371.903	plant 4	629.603	plant 4	4419.38		plant 8	134.516	plant 8	249.83	plant 8	624.354
plant 4	1211.38	plant 5	150.675	plant 4	3558.54		plant 8	150.673	plant 9	245.477	plant 8	638.367
plant 5	157.747	plant 5	398.808	plant 5	3073.35		plant 9	212.43	plant 10	227.667	plant 9	708.978
plant 5	1492.93	plant 5	432.103	plant 5	3323.74		plant 10	369.292	plant 10	879.174	plant 11	1600.32
plant 5	1556.26	plant 5	589.26	plant 5	1971.45		plant 10	298.237	plant 11	128.137
plant 5	418.265			plant 5	1322.92		plant 11	208.935

## Sheet: Descriptive statistics
	Control			pENOD11::NF-YA1
	IC	NCs	NP	IC	NCs	NP
Number of values	22	21	22	22	21	20
Minimum	86.29	148	1323	23.85	54.09	423.4
25% Percentile	369.4	314.5	1912	125	152.8	749.3
Median	1139	651.4	2730	210.7	333.2	1243
75% Percentile	1552	3085	3382	512	584.5	2405
Maximum	2156	5372	13172	1441	2108	7785
Range	2070	5224	11849	1418	2053	7362
Mean	1003	1537	3214	357.5	514.6	2004
Std. Deviation	665.2	1567	2491	359.7	540.3	1954
Std. Error of Mean	141.8	342	531	76.68	117.9	436.9
Lower 95% CI of mean	707.6	823.1	2110	198	268.6	1089
Upper 95% CI of mean	1298	2250	4318	516.9	760.5	2918

## Sheet: Normality
	Control			pENOD11::NF-YA1
	IC	NCs	NP	IC	NCs	NP
Test for normal distribution
Shapiro-Wilk test
W	0.913	0.8243	0.6231	0.8099	0.7462	0.7363
P value	0.0545	0.0016	<0,0001	0.0007	0.0001	0.0001
Passed normality test (alpha=0.05)?	Yes	No	No	No	No	No
P value summary	ns	**	****	***	***	***
Kolmogorov-Smirnov test
KS distance	0.2119	0.2377	0.2632	0.2429	0.2396	0.2421
P value	0.0113	0.0031	0.0004	0.0016	0.0027	0.0033
Passed normality test (alpha=0.05)?	No	No	No	No	No	No
P value summary	*	**	***	**	**	**
Number of values	22	21	22	22	21	20

## Sheet: Kruskal-Wallis
Number of families	1
Number of comparisons per family	15
Alpha	0.05
Dunn's multiple comparisons test	Mean rank diff,	Significant?	Summary	Adjusted P Value
IC (Control) vs. NCs (Control)	-5.491	No	ns	>0,9999
IC (Control) vs. NP (Control)	-43.41	Yes	**	0.0016
IC (Control) vs. IC (pENOD11::NF-YA1)	32.23	No	ns	0.0594
IC (Control) vs. NCs (pENOD11::NF-YA1)	23.13	No	ns	0.6148
IC (Control) vs. NP (pENOD11::NF-YA1)	-20.18	No	ns	>0,9999
NCs (Control) vs. NP (Control)	-37.92	Yes	*	0.0121
NCs (Control) vs. IC (pENOD11::NF-YA1)	37.72	Yes	*	0.0129
NCs (Control) vs. NCs (pENOD11::NF-YA1)	28.62	No	ns	0.1863
NCs (Control) vs. NP (pENOD11::NF-YA1)	-14.69	No	ns	>0,9999
NP (Control) vs. IC (pENOD11::NF-YA1)	75.64	Yes	****	<0,0001
NP (Control) vs. NCs (pENOD11::NF-YA1)	66.54	Yes	****	<0,0001
NP (Control) vs. NP (pENOD11::NF-YA1)	23.23	No	ns	0.6404
IC (pENOD11::NF-YA1) vs. NCs (pENOD11::NF-YA1)	-9.1	No	ns	>0,9999
IC (pENOD11::NF-YA1) vs. NP (pENOD11::NF-YA1)	-52.41	Yes	****	<0,0001
NCs (pENOD11::NF-YA1) vs. NP (pENOD11::NF-YA1)	-43.31	Yes	**	0.0028
Test details	Mean rank 1	Mean rank 2	Mean rank diff,	n1	n2	Z
IC (Control) vs. NCs (Control)	62.32	67.81	-5.491	22	21	0.4852
IC (Control) vs. NP (Control)	62.32	105.7	-43.41	22	22	3.881
IC (Control) vs. IC (pENOD11::NF-YA1)	62.32	30.09	32.23	22	22	2.881
IC (Control) vs. NCs (pENOD11::NF-YA1)	62.32	39.19	23.13	22	21	2.044
IC (Control) vs. NP (pENOD11::NF-YA1)	62.32	82.5	-20.18	22	20	1.761
NCs (Control) vs. NP (Control)	67.81	105.7	-37.92	21	22	3.351
NCs (Control) vs. IC (pENOD11::NF-YA1)	67.81	30.09	37.72	21	22	3.333
NCs (Control) vs. NCs (pENOD11::NF-YA1)	67.81	39.19	28.62	21	21	2.5
NCs (Control) vs. NP (pENOD11::NF-YA1)	67.81	82.5	-14.69	21	20	1.268
NP (Control) vs. IC (pENOD11::NF-YA1)	105.7	30.09	75.64	22	22	6.763
NP (Control) vs. NCs (pENOD11::NF-YA1)	105.7	39.19	66.54	22	21	5.879
NP (Control) vs. NP (pENOD11::NF-YA1)	105.7	82.5	23.23	22	20	2.027
IC (pENOD11::NF-YA1) vs. NCs (pENOD11::NF-YA1)	30.09	39.19	-9.1	22	21	0.8041
IC (pENOD11::NF-YA1) vs. NP (pENOD11::NF-YA1)	30.09	82.5	-52.41	22	20	4.573
NCs (pENOD11::NF-YA1) vs. NP (pENOD11::NF-YA1)	39.19	82.5	-43.31	21	20	3.737
Kruskal-Wallis test
P value	<0,0001
Exact or approximate P value?	Approximate
P value summary	****
Do the medians vary signif. (P < 0.05)?	Yes
Number of groups	6
Kruskal-Wallis statistic	60.83
Data summary
Number of treatments (columns)	6
Number of values (total)	128
Compact letter display
NP (Control)	A
NP (pENOD11::NF-YA1)	A B
NCs (Control)	B C
IC (Control)	B D
NCs (pENOD11::NF-YA1)	C D
IC (pENOD11::NF-YA1)	D
