# Supplementary material for: Competence for transcellular infection in the root cortex involves a post-replicative, cell-cycle exit decision in Medicago truncatula
Source: eLife. 2025 Jul 4;12:RP88588. doi: 10.7554/eLife.88588 (PMC12227204; doi:10.7554/eLife.88588)
Supplement: Figure 9—figure supplement 4—source data 3. [file elife-88588-fig9-figsupp4-data3.xlsx]

## Sheet: Values
Figure 9 – figure supplement 4 – source data 3
Number of infected cells per cortical layer and statistical analysis.
Control				pENOD11::NF-YA1
plant 1	C1	1		plant 1	C1	1
plant 1	C2	1		plant 1	C2	4
plant 1	C3	2		plant 1	C1	1
plant 2	C1	1		plant 1	C2	1
plant 2	C2	1		plant 1	C3	4
plant 2	C3	1		plant 2	C1	2
plant 2	C1	1		plant 2	C2	2
plant 2	C2	1		plant 3	C1	1
plant 2	C3	1		plant 3	C2	4
plant 2	C3	2		plant 4	C1	3
plant 2	C1	1		plant 5	C1	1
plant 2	C2	1		plant 5	C2	1
plant 2	C3	1		plant 5	C3	1
plant 3	C2	2		plant 6	C1	1
plant 3	C3	4		plant 6	C2	1
plant 3	C1	1		plant 6	C1	3
plant 3	C2	2		plant 6	C2	1
plant 3	C3	2		plant 6	C1	1
plant 4	C1	1		plant 6	C2	2
plant 4	C2	2		plant 6	C1	1
plant 5	C1	1		plant 6	C2	1
plant 5	C1	1		plant 6	C1	1
plant 5	C2	2		plant 6	C2	1
plant 5	C3	1		plant 6	C3	1
plant 6	C1	1		plant 6	C1	1
plant 6	C2	2		plant 6	C2	1
plant 7	C1	1		plant 6	C3	2
plant 7	C2	2		plant 7	C1	1
plant 7	C3	1		plant 7	C2	1
plant 8	C1	1		plant 7	C3	1
plant 8	C2	1		plant 7	C1	1
plant 8	C3	1		plant 7	C2	1
				plant 8	C1	1
				plant 8	C2	1
				plant 8	C1	1
				plant 8	C2	1
				plant 8	C3	2
				plant 8	C1	1
				plant 8	C2	1
				plant 8	C3	1
				plant 8	C1	1
				plant 8	C2	1
				plant 8	C3	1
				plant 9	C1	1
				plant 9	C2	1
				plant 9	C3	1
				plant 10	C1	1
				plant 10	C2	1
				plant 10	C3	2
				plant 10	C1	1
				plant 11	C1	1
				plant 11	C2	1
				plant 11	C3	1
				plant 11	C1	1
				plant 11	C2	2
				plant 11	C3	5
				plant 11	C1	1
				plant 11	C2	1
				plant 11	C3	2
				plant 12	C1	1
				plant 12	C2	1
				plant 12	C3	1
				plant 13	C1	1
				plant 14	C1	2
				plant 14	C2	2
				plant 15	C1	1
				plant 15	C2	1
				plant 15	C3	1
				plant 15	C1	1
				plant 15	C2	1

## Sheet: Descriptive statistics
	Control	pENOD11::NF-YA1
Number of values	32	70
Minimum	1	1
25% Percentile	1	1
Median	1	1
75% Percentile	2	1
Maximum	4	5
Range	3	4
Mean	1.375	1.386
Std. Deviation	0.6599	0.8562
Std. Error of Mean	0.1167	0.1023
Lower 95% CI of mean	1.137	1.182
Upper 95% CI of mean	1.613	1.59

## Sheet: Normality
	Control	pENOD11::NF-YA1
Test for normal distribution
Shapiro-Wilk test
W	0.5895	0.5177
P value	<0,0001	<0,0001
Passed normality test (alpha=0.05)?	No	No
P value summary	****	****
Kolmogorov-Smirnov test
KS distance	0.4026	0.4452
P value	<0,0001	<0,0001
Passed normality test (alpha=0.05)?	No	No
P value summary	****	****
Number of values	32	70

## Sheet: Mann-Whitney
Column B	pENOD11::NF-YA1
vs.	vs,
Column A	Control
Mann Whitney test
P value	0.4883
Exact or approximate P value?	Exact
P value summary	ns
Significantly different (P < 0.05)?	No
One- or two-tailed P value?	Two-tailed
Sum of ranks in column A,B	1721 , 3533
Mann-Whitney U	1048
Difference between medians
Median of column A	1,000, n=32
Median of column B	1,000, n=70
Difference: Actual	0
Difference: Hodges-Lehmann	0
