# Supplementary material for: Competence for transcellular infection in the root cortex involves a post-replicative, cell-cycle exit decision in Medicago truncatula
Source: eLife. 2025 Jul 4;12:RP88588. doi: 10.7554/eLife.88588 (PMC12227204; doi:10.7554/eLife.88588)
Supplement: Figure 9—source data 1. [file elife-88588-fig9-data1.xlsx]

## Sheet: Values
Figure 9 – source data 1
Number of intracellular IT tips and statistical analysis.
Control			pENOD11::NF-YA1
plant 1	0		plant 1	2
plant 1	4		plant 1	4
plant 1	0		plant 1	0
plant 1	1		plant 1	3
plant 1	5		plant 1	1
plant 1	1		plant 1	0
plant 1	0		plant 1	0
plant 1	3		plant 1	2
plant 1	0		plant 1	2
plant 1	2		plant 1	2
plant 1	0		plant 1	0
plant 1	4		plant 2	4
plant 1	2		plant 2	0
plant 2	0		plant 3	0
plant 2	1		plant 3	2
plant 3	0		plant 3	0
plant 3	0		plant 3	0
plant 3	0		plant 3	1
plant 3	1		plant 4	2
plant 3	2		plant 4	2
plant 3	2		plant 4	0
plant 3	1		plant 5	0
plant 3	1		plant 5	3
plant 3	1		plant 5	1
plant 3	1		plant 5	2
plant 3	0		plant 5	0
plant 4	1		plant 5	0
plant 4	0		plant 5	2
plant 4	1		plant 5	0
plant 5	0		plant 5	1
plant 5	1		plant 5	0
plant 5	2		plant 5	0
plant 5	0		plant 5	0
plant 5	0		plant 5	0
plant 5	0		plant 5	0
plant 6	0		plant 5	2
plant 6	4		plant 5	0
plant 6	1		plant 5	0
plant 7	1		plant 5	0
plant 7	1		plant 5	0
plant 7	0		plant 6	2
plant 7	0		plant 6	0
plant 8	1		plant 6	0
plant 8	0		plant 6	1
plant 8	0		plant 6	0
plant 8	0		plant 7	0
plant 8	0		plant 7	0
plant 8	0		plant 7	0
plant 8	0		plant 7	2
plant 8	0		plant 7	1
			plant 7	0
			plant 7	2
			plant 7	3
			plant 7	2
			plant 7	0
			plant 7	1
			plant 7	2
			plant 8	2
			plant 8	1
			plant 8	1
			plant 9	0
			plant 9	0
			plant 9	2
			plant 9	0
			plant 9	3
			plant 10	0
			plant 10	1
			plant 10	0
			plant 10	2
			plant 10	3
			plant 10	5
			plant 10	4
			plant 10	1
			plant 10	3
			plant 10	2
			plant 10	4
			plant 10	2
			plant 10	1
			plant 10	1
			plant 10	2
			plant 10	0
			plant 11	0
			plant 11	0
			plant 11	0
			plant 12	2
			plant 12	0
			plant 13	1
			plant 13	2
			plant 13	0
			plant 13	0
			plant 14	0
			plant 14	0
			plant 14	1
			plant 14	2
			plant 14	1
			plant 14	2

## Sheet: Descriptive statistics
	Control	pENOD11::NF-YA1
Number of values	50	96
Minimum	0	0
25% Percentile	0	0
Median	0.5	1
75% Percentile	1	2
Maximum	5	5
Range	5	5
Mean	0.9	1.094
Std. Deviation	1.249	1.232
Std. Error of Mean	0.1767	0.1257
Lower 95% CI of mean	0.5449	0.8442
Upper 95% CI of mean	1.255	1.343

## Sheet: Normality
	Control	pENOD11::NF-YA1
Test for normal distribution
Shapiro-Wilk test
W	0.7259	0.8124
P value	<0,0001	<0,0001
Passed normality test (alpha=0.05)?	No	No
P value summary	****	****
Kolmogorov-Smirnov test
KS distance	0.2681	0.271
P value	<0,0001	<0,0001
Passed normality test (alpha=0.05)?	No	No
P value summary	****	****
Number of values	50	96

## Sheet: Mann-Whitney
Column B	pENOD11::NF-YA1
vs.	vs,
Column A	Control
Mann Whitney test
P value	0.2814
Exact or approximate P value?	Exact
P value summary	ns
Significantly different (P < 0.05)?	No
One- or two-tailed P value?	Two-tailed
Sum of ranks in column A,B	3430 , 7301
Mann-Whitney U	2155
Difference between medians
Median of column A	0,5000, n=50
Median of column B	1,000, n=96
Difference: Actual	0.5
Difference: Hodges-Lehmann	0
