# Supplementary material for: Competence for transcellular infection in the root cortex involves a post-replicative, cell-cycle exit decision in Medicago truncatula
Source: eLife. 2025 Jul 4;12:RP88588. doi: 10.7554/eLife.88588 (PMC12227204; doi:10.7554/eLife.88588)
Supplement: Supplementary file 1. [file elife-88588-supp1.xlsx]

## Sheet: L2
Supplementary File 1-table S1. Binary plasmids generated using Golden Gate cloning.
All constructs were assembled using the MoClo method (Weber et al., 2011).
(1) : MoClo-compatible modules designed according to Binder et al., 2014.
	Construct	Experiment	Backbone	Position 1	Position 2	Position 3	Position 4	Position 5	Position 6
L2 binary vectors	pH3.1::H3.1-eGFP / pH3.3::H3.3-mCherry-95264	Assessment of proliferation or endoreduplication activities (Medicago)	pL2V-1	pH3.3::H3.3-mCherry-95261	pH3.1::H3.1-eGFP-95262	dummy (1)	ELE-3
	pH3.1(2)::H3.1(2)-eGFP / pH3.3::H3.3-mCherry-95266	Assessment of proliferation or endoreduplication activities (Medicago)	pL2V-1	pH3.3::H3.3-mCherry-95261	insulator (1)	pH3.1(2)::H3.1(2)-eGFP-95265	ELE-3
	pCYCB1;2::N-CYCB1;2-NLS-3xVenus / pLjUbi::NLS-2xmCherry-95268	Labeling of cells that transit through G2/M (Medicago)	pL2V-1	pLjUbi::NLS-2xmCherry	insulator (1)	pCYCB1;2::N-CYCB1;2-NLS-3xVenus-95267	ELE-3
	PlaCCI v2-95441	Labeling of all cell-cycle phases (Medicago)	pL2V-1	pH3.1::H3.1-mCherry-95508	insulator (1)	pCYCB1;2::N-CYCB1;2-mCitrine-95509	insulator (1)	pCDT1a::CDT1a-mTurquoise2-95510	ELE-5
	pKNOLLE::NLS-3xVenus / pLjUbi::NLS-2xmCherry-95270	Assessment of cell division activity (Medicago)	pL2V-1	pLjUbi::NLS-2xmCherry	insulator (1)	pKNOLLE::NLS-3xVenus-95269	ELE-3
	pKNOLLE::D-box-3xVenus-NLS / pLjUbi::NLS-2xmCherry-95272	Labeling of cells that transit through G2/M (Medicago)	pL2V-1	pLjUbi::NLS-2xmCherry	insulator (1)	pKNOLLE::D-box-3xVenus-NLS-95271	ELE-3
	pCENH3::mCitrine-CENH3 / pH3.3::H3.3-mCherry-95274	Individual chromosome labeling and quantification (Medicago)	pL2V-1	pH3.3::H3.3-mCherry-95261	insulator (1)	pCENH3::mCitrine-CENH3-95273	ELE-3
	pLjUbi::mCitrine-CENH3 / pH3.3::H3.3-mCherry-95276	Individual chromosome labeling and quantification (Medicago)	pL2V-1	pH3.3::H3.3-mCherry-95261	insulator (1)	pLjUbi::mCitrine-CENH3-95275	ELE-3
	pNPL::NLS-3xVenus / pENOD11::NLS-2xmCherry-95513	Assessment of cellular activation profile during cortical infection (Medicago)	pL2V-1	pSlEXT1::RUBY	insulator (1)	pNPL::NLS-3xVenus-95511	insulator (1)	pENOD11::NLS-2xmCherry-95512	ELE-5
	pENOD11::NLS-3xVenus / pLjUbi::NLS-2xmCherry-95515	Assessment of cellular activation profile during cortical infection (Medicago)	pL2V-1	pLjUbi::NLS-2xmCherry	insulator (1)	pENOD11::NLS-3xVenus-95514	ELE-3
	Control [EV] / pSlEXT1::RUBY-95516	Additional NF-YA1 expression on the infection trajectory (Medicago)	pL2V-1	pSlEXT1::RUBY	dummy (1)	insulator (1)	dummy (1)	ELE-4
	pENOD11::NF-YA1 / pSlEXT1::RUBY-95518	Additional NF-YA1 expression on the infection trajectory (Medicago)	pL2V-1	pSlEXT1::RUBY	dummy (1)	insulator (1)	dummy (1)	pENOD11::FLAG-NF-YA1-95517	ELE-5
	pENOD11::NF-YA1 / pKNOLLE::D-box-3xVenus-NLS / pLjUbi::NLS-2xmCherry-95519	Additional NF-YA1 expression on the infection trajectory (Medicago)	pL2V-1	pLjUbi::NLS-2xmCherry	insulator (1)	pKNOLLE::D-box-3xVenus-NLS-95271	insulator (1)	pENOD11::FLAG-NF-YA1-95517	ELE-5
	pLjUbi::eGFP-NtMybA2Δ630 / proH3.3::H3.3-mCherry-95279	Transactivation assays (Nicotiana)	pL2V-1	dummy (1)	pH3.3::H3.3-mCherry-95278	pLjUbi::eGFP-NtMybA2Δ630-95277	ELE-3
	pKNOLLE::GUS / pLjUbi::NLS-2xCFP-95281	Transactivation assays, CDELS - fluorometric GUS assays (Nicotiana)	pL2V-1	pLjUbi::NLS-2xCFP	insulator (1)	pKNOLLE::GUS-95280	ELE-3
	pCYCB1;2::GUS / pLjUbi::NLS-2xCFP-95283	Transactivation assays (Nicotiana)	pL2V-1	pLjUbi::NLS-2xCFP	insulator (1)	pCYCB1;2::GUS-95282	ELE-3
	pKNOLLE(mutMSA1-3)::GUS / pLjUbi::NLS-2xCFP-95285	Transactivation assays (Nicotiana)	pL2V-1	pLjUbi::NLS-2xCFP	insulator (1)	pKNOLLE(mutMSA1-3)::GUS-95284	ELE-3
	p35S::CYCD3;1-HA-95287	CDELS - fluorometric GUS assays, confocal microscopy, immunoblot analyses (Nicotiana)	pL2V-1	dummy (1)	dummy (1)	dummy (1)	p35S::CYCD3;1-HA-95286	ELE-4
	pH3.1::NLS-3xVenus / pH3.3::H3.3-mCherry-95289	CDELS - fluorometric GUS assays (Nicotiana)	pL2V-1	dummy (1)	pH3.3::H3.3-mCherry-95278	pH3.1::NLS-3xVenus-95288	ELE-3
	pLjUbi::eGFP-NF-YA1 / pH3.3::H3.3-mCherry-95291	CDELS - fluorometric GUS assays (Nicotiana)	pL2V-1	dummy (1)	pH3.3::H3.3-mCherry-95278	dummy (1)	dummy (1)	pLjUbi::eGFP-NF-YA1-95290	ELE-5
	pLjUbi::eGFP-NF-YA1 mutDBD / pH3.3::H3.3-mCherry-95293	CDELS - fluorometric GUS assays (Nicotiana)	pL2V-1	dummy (1)	pH3.3::H3.3-mCherry-95278	dummy (1)	dummy (1)	pLjUbi::eGFP-NF-YA1 mutDBD-95292	ELE-5
	pAtUbi::HA-MYB3RR / pH3.3::H3.3-mCherry-95295	CDELS - fluorometric GUS assays (Nicotiana)	pL2V-1	pH3.3::H3.3-mCherry-95261	insulator (1)	pAtUbi::HA-MYB3RR- 95294	ELE-3
	pH4::GUS / pLjUbi::NLS-2xCFP-95297	CDELS - fluorometric GUS assays (Nicotiana)	pL2V-1	pLjUbi::NLS-2xCFP	dummy (1)	pH4::GUS-95296	ELE-3
	p35S::CYCD3;1-HA / pLjUbi::FLAG-NF-YA1-95299	CDELS - confocal microscopy, immunoblot analyses (Nicotiana)	pL2V-1	dummy (1)	dummy (1)	dummy (1)	p35S::CYCD3;1-HA-95286	pLjUbi::FLAG-NF-YA1-95298	ELE-5
	pKNOLLE::eGFP-KNOLLE / pH3.3::H3.3-mCherry-95301	CDELS - confocal microscopy, immunoblot analyses (Nicotiana)	pL2V-1	pH3.3::H3.3-mCherry-95261	dummy (1)	dummy (1)	insulator (1)	pKNOLLE::eGFP-KNOLLE-95300	ELE-5
	pLjUbi::FLAG-NF-YA1-95303	CDELS - immunoblot analyses (Nicotiana)	pL2V-1	dummy (1)	dummy (1)	dummy (1)	dummy (1)	pLjUbi::FLAG-NF-YA1-95298	ELE-5

## Sheet: L1
Supplementary File 1-table S1. Binary plasmids generated using Golden Gate cloning.
All constructs were assembled using the MoClo method (Weber et al., 2011).
	Construct	Backbone	Promoter	N-terminal tag	ORF/CDS	C-terminal tag	Terminator
L1 expression cassettes	pH3.3::H3.3-mCherry-95261	pL1V-F1	pH3.3 (3245 bp)	none	H3.3-ORF	SS linker-mCherry	T-nos
	pH3.3::H3.3-mCherry-95278	pL1V-R2	pH3.3 (3245 bp)	none	H3.3-ORF	SS linker-mCherry	T-nos
	pH3.1::H3.1-eGFP-95262	pL1V-F2	pH3.1 (2623 bp)	none	H3.1-ORF	SS linker-eGFP	T-35S
	pH3.1::H3.1-mCherry-95508	pL1V-F1	pH3.1 (2623 bp)	none	H3.1-ORF	SS linker-mCherry	T-35S
	pH3.1(2)::H3.1(2)-eGFP-95265	pL1V-F3	pH3.1(2) (2580 bp)	none	H3.1(2)-ORF	GG linker-eGFP	T-35S
	pCYCB1;2::N-CYCB1;2-NLS-3xVenus-95267	pL1V-F3	pCYCB1;2 (1090 bp) + N-CYCB1;2	NLS	2xVenus	Venus	T-nos
	pCYCB1;2::N-CYCB1;2-mCitrine-95509	pL1V-F3	pCYCB1;2 (1090 bp) + N-CYCB1;2	mCitrine	none	none	T-nos
	pCDT1a::CDT1a-mTurquoise2-95510	pL1V-F5	pCDT1a (2548 bp)	none	CDT1a-ORF	GG linker-mTurquoise2	T-HSP18
	pKNOLLE::NLS-3xVenus-95269	pL1V-F3	pKNOLLE (2325 bp)	NLS	2xVenus	Venus	T-nos
	pKNOLLE::D-box-3xVenus-NLS-95271	pL1V-F3	pKNOLLE (2325 bp)	N-CYCB1;1	3xVenus-NLS	none	T-nos
	pCENH3::mCitrine-CENH3-95273	pL1V-F3	pCENH3 (1000 bp)	mCitrine-GG linker	CENH3-CDS	none	T-Act2
	pLjUbi::mCitrine-CENH3-95275	pL1V-F3	pLjUbi	mCitrine-GG linker	CENH3-CDS	none	T-Act2
	pLjUbi::eGFP-NtMybA2Δ630-95277	pL1V-F3	pLjUbi	eGFP-GGGGSGGGGSGGGGS linker	NtMybA2Δ630-CDS	none	T-nos
	pKNOLLE::GUS-95280	pL1V-F3	pKNOLLE (2325 bp)	none	GUS-ORF	none	T-nos
	pCYCB1;2::GUS-95282	pL1V-F3	pCYCB1;2 (1090 bp)	none	GUS-ORF	none	T-nos
	pKNOLLE(mutMSA1-3)::GUS-95284	pL1V-F3	pKNOLLE(mutMSA1-3) (2325 bp)	none	GUS-ORF	none	T-nos
	p35S::CYCD3;1-HA-95286	pL1V-F4	p35S	none	CYCD3;1-CDS	3xHA	T-35S
	pH3.1::NLS-3xVenus-95288	pL1V-F3	pH3.1 (2623 bp)	NLS	2xVenus	Venus	T-nos
	pLjUbi::eGFP-NF-YA1-95290	pL1V-F5	pLjUbi	eGFP-GGGGSGGGGSGGGGS linker	NF-YA1-ORF	none	T-nos
	pLjUbi::eGFP-NF-YA1 mutDBD-95292	pL1V-F5	pLjUbi	eGFP-GGGGSGGGGSGGGGS linker	NF-YA1 mutDBD-ORF	none	T-nos
	pAtUbi::HA-MYB3RR- 95294	pL1V-F3	pAtUbi	3xHA	MYB3RR-CDS	none	T-35S
	pH4::GUS-95296	pL1V-F3	pH4 (2080 bp)	none	GUS-ORF	none	T-nos
	pLjUbi::FLAG-NF-YA1-95298	pL1V-F5	pLjUbi	FLAG	NF-YA1-ORF	none	T-nos
	pKNOLLE::eGFP-KNOLLE-95300	pL1V-F5	pKNOLLE (2325 bp)	eGFP-GG linker	KNOLLE-ORF	none	T-35S
	pNPL::NLS-3xVenus-95511	pL1V-R3	pNPL (2038 bp)	NLS	2xVenus	Venus	T-nos
	pENOD11::NLS-2xmCherry-95512	pL1V-F5	pENOD11 (1003 bp)	NLS	mCherry	mCherry	T-35S
	pENOD11::NLS-3xVenus-95514	pL1V-F3	pENOD11 (1003 bp)	NLS	2xVenus	Venus	T-35S
	pENOD11::FLAG-NF-YA1-95517	pL1V-F5	pENOD11 (1003 bp)	FLAG	NF-YA1-ORF	none	T-nos
L1 selection markers	pLjUbi::NLS-2xmCherry	pL1V-R1	pLjUbi	NLS	mCherry	mCherry	T-nos
	pLjUbi::NLS-2xCFP	pL1V-R1	pLjUbi	NLS	2xCFP	none	T-35S
	pSlEXT1::RUBY	pL1V-R1	pSlEXT1	none	RUBY	none	T-35S
